# Supplementary material for: Use of Automatic Dishwashers and Their Programs in Europe with a Special Focus on Energy Consumption
Source: MDPI journal article supplement (doi:10.3390/cleantechnol5030054), 2023-09-20
Supplement: s1 [file s1]

**Supplementary material S1: Anonymized brands and models with their individual consumption of energy, water, time and temperatures.**

|                  |      | Short Cycle |              |           |                  | Eco Cycle  |              |           |                  | Intensive cycle |              |           |                  | Normal cycle |              |           |                  | Auto cycle 45 |              |           |                  | Auto cycle 55 |              |           |                  | Auto cycle 65-70 |              |           |                  | Auto Avg. (Auto cycle 45, auto 55, auto 65-70) |              |           |                  | Glass Cycle |              |           |                  | 1h/60 min. cycle |      |      |  |
|------------------|------|-------------|--------------|-----------|------------------|------------|--------------|-----------|------------------|-----------------|--------------|-----------|------------------|--------------|--------------|-----------|------------------|---------------|--------------|-----------|------------------|---------------|--------------|-----------|------------------|------------------|--------------|-----------|------------------|------------------------------------------------|--------------|-----------|------------------|-------------|--------------|-----------|------------------|------------------|------|------|--|
|                  |      | Time (min)  | Energy (kWh) | Water (L) | Temperature (°C) | Time (min) | Energy (kWh) | Water (L) | Temperature (°C) | Time (min)      | Energy (kWh) | Water (L) | Temperature (°C) | Time (min)   | Energy (kWh) | Water (L) | Temperature (°C) | Time (min)    | Energy (kWh) | Water (L) | Temperature (°C) | Time (min)    | Energy (kWh) | Water (L) | Temperature (°C) | Time (min)       | Energy (kWh) | Water (L) | Temperature (°C) | Time (min)                                     | Energy (kWh) | Water (L) | Temperature (°C) | Time (min)  | Energy (kWh) | Water (L) | Temperature (°C) |                  |      |      |  |
| Brand 1, Model a |      | 30          | 0.850        | 12.0      | 50.0             |            |              |           |                  | 115             | 2.000        | 19.0      | 70.0             | 94           | 1.254        | 15.0      | 65.0             |               |              |           |                  |               |              |           |                  |                  |              |           |                  |                                                |              |           |                  |             |              |           |                  |                  |      |      |  |
| Brand 1, Model b |      | 30          | 0.800        | 10.0      | 65.0             | 227        | 1.039        | 11.0      | 50.0             | 163             | 1.600        | 14.5      | 70.0             |              |              |           |                  | 45            | 0.700        | 7.0       | 45.0             |               |              |           | 156              | 1.400            | 12.0         | 70.0      | 101              | 1.050                                          | 9.5          | 57.5      |                  |             |              |           |                  |                  |      |      |  |
| Brand 1, Model c |      | 30          | 0.800        | 10.0      | 65.0             | 237        | 0.820        | 9.9       | 50.0             | 140             | 1.400        | 13.0      | 70.0             |              |              |           |                  | 45            | 0.700        | 7.0       | 45.0             |               |              |           | 160              | 1.500            | 12.0         | 70.0      | 103              | 1.100                                          | 9.5          | 57.5      | 70               | 0.900       | 13.0         | 45.0      |                  |                  |      |      |  |
| Brand 1, Model d |      | 30          | 0.800        | 10.0      | 65.0             | 237        | 0.820        | 9.9       | 50.0             | 160             | 1.600        | 15.0      | 70.0             |              |              |           |                  | 45            | 0.700        | 7.0       | 45.0             |               |              |           | 160              | 1.500            | 12.0         | 70.0      | 103              | 1.100                                          | 9.5          | 57.5      | 85               | 1.100       | 14.0         | 45.0      |                  |                  |      |      |  |
| Brand 1, Model e |      | 30          | 0.900        | 10.0      | 65.0             | 232        | 0.846        | 11.0      | 50.0             | 170             | 1.400        | 12.4      | 70.0             |              |              |           |                  | 40            | 0.600        | 7.0       | 45.0             |               |              |           | 170              | 1.600            | 14.0         | 70.0      | 105              | 1.100                                          | 10.5         | 57.5      | 82               | 0.700       | 12.0         | 45.0      |                  |                  |      |      |  |
| Brand 1, Model f |      | 30          | 0.900        | 10.0      | 65.0             | 232        | 0.846        | 11.0      | 50.0             | 190             | 1.700        | 14.5      | 70.0             |              |              |           |                  | 40            | 0.600        | 7.0       | 45.0             |               |              |           | 170              | 1.600            | 14.0         | 70.0      | 105              | 1.100                                          | 10.5         | 57.5      | 92               | 0.900       | 14.0         | 45.0      |                  |                  |      |      |  |
| Brand 1, Model g |      | 30          | 0.900        | 10.0      | 60.0             | 225        | 0.961        | 11.0      | 50.0             | 174             | 1.600        | 13.5      | 70.0             |              |              |           |                  | 40            | 0.600        | 7.0       | 45.0             |               |              |           | 160              | 1.600            | 14.0         | 70.0      | 100              | 1.100                                          | 10.5         | 57.5      | 80               | 0.800       | 13.0         | 45.0      |                  |                  |      |      |  |
| Brand 1, Model h |      | 30          | 0.900        | 8.0       | 60.0             | 195        | 0.890        | 8.9       | 50.0             | 135             | 1.250        | 12.5      | 70.0             |              |              |           |                  | 80            | 0.800        | 8.0       | 45.0             |               |              |           | 130              | 1.300            | 16.0         | 70.0      | 105              | 1.050                                          | 12.0         | 57.5      |                  |             |              |           |                  |                  |      |      |  |
| Brand 1, Model i |      | 30          | 0.900        | 10.0      | 60.0             | 235        | 0.846        | 11.0      | 50.0             | 180             | 1.550        | 13.5      | 70.0             | 89           | 1.140        | 12.9      | 60.0             | 46            | 0.700        | 8.0       | 45.0             |               |              |           | 170              | 1.700            | 15.0         | 70.0      | 108              | 1.200                                          | 11.5         | 57.5      | 82-92            | 0.8-1.0     | 12-14.0      | 45.0      |                  |                  |      |      |  |
| Brand 1, Model j |      | 30          | 0.900        | 10.0      | 60.0             | 225        | 0.832        | 10.5      | 50.0             | 165             | 1.550        | 13.5      | 70.0             |              |              |           |                  | 40            | 0.600        | 7.0       | 45.0             |               |              |           | 154              | 1.600            | 14.0         | 70.0      | 97               | 1.100                                          | 10.5         | 57.5      | 94               | 0.900       | 14.0         | 45.0      |                  |                  |      |      |  |
| Brand 1          | avg. | 30          | 0.865        | 10.0      | 61.5             | 227        | 0.878        | 10.5      | 50.0             | 159             | 1.565        | 14.1      | 70.0             | 92           | 1.197        | 14.0      | 62.5             | 47            | 0.667        | 7.2       | 45.0             |               |              |           | 159              | 1.533            | 13.7         | 70.0      | 103              | 1.100                                          | 10.4         | 57.5      | 84               | 0.883       | 13.3         | 45.0      |                  |                  |      |      |  |
| Brand 1          | MIN. | 30          | 0.800        | 8.0       | 50.0             | 195        | 0.820        | 8.9       | 50.0             | 115             | 1.250        | 12.4      | 70.0             | 89           | 1.140        | 12.9      | 60.0             | 40            | 0.600        | 7.0       | 45.0             |               |              |           | 130              | 1.300            | 12.0         | 70.0      | 97               | 1.050                                          | 9.5          | 57.5      | 70               | 0.700       | 12.0         | 45.0      |                  |                  |      |      |  |
| Brand 1          | MAX. | 30          | 0.900        | 12.0      | 65.0             | 237        | 1.039        | 11.0      | 50.0             | 190             | 2.000        | 19.0      | 70.0             | 94           | 1.254        | 15.0      | 65.0             | 80            | 0.800        | 8.0       | 45.0             |               |              |           | 170              | 1.700            | 16.0         | 70.0      | 108              | 1.200                                          | 12.0         | 57.5      | 94               | 1.100       | 14.0         | 45.0      |                  |                  |      |      |  |
| Brand 2, Model a |      | 30          | 0.500        | 10.0      | 35.0             | 155        | 0.800        | 13.0      | 50.0             | 103             | 1.400        | 20.0      | 70.0             | 140          | 1.350        | 18.0      | 65.0             |               |              |           |                  |               |              |           |                  |                  |              |           |                  |                                                |              |           |                  |             |              |           |                  |                  |      |      |  |
| Brand 2, Model b |      | 30          | 0.500        | 10.0      | 35.0             | 155        | 0.800        | 13.0      | 50.0             | 103             | 1.400        | 20.0      | 70.0             | 140          | 1.350        | 18.0      | 65.0             |               |              |           |                  |               |              |           |                  |                  |              |           |                  |                                                |              |           |                  |             |              |           |                  |                  |      |      |  |
| Brand 2, Model c |      | 30          | 0.800        | 10.0      | 45.0             | 140        | 1.050        | 14.0      | 50.0             | 112             | 1.600        | 21.0      | 70.0             |              |              |           |                  | 95            | 1.150        | 11.0      | 55.0             |               |              |           | 145              | 1.500            | 19.0         | 65.0      | 120              | 1.325                                          | 15.0         | 60.0      | 72               | 0.800       | 15.0         | 40.0      |                  |                  |      |      |  |
| Brand 2, Model d |      | 35          | 0.900        | 13.0      | 35.0             | 140        | 1.050        | 16.0      | 50.0             | 130             | 1.800        | 19.0      | 70.0             | 125          | 1.750        | 19.0      | 65.0             |               |              |           |                  |               |              |           |                  |                  |              |           |                  |                                                |              |           |                  |             |              |           |                  |                  |      |      |  |
| Brand 2          | avg. | 31          | 0.675        | 10.8      | 37.5             | 148        | 0.925        | 14.0      | 50.0             | 112             | 1.550        | 20.0      | 70.0             | 135          | 1.483        | 18.3      | 65.0             | 95            | 1.150        | 11.0      | 55.0             |               |              |           | 145              | 1.500            | 19.0         | 65.0      | 120              | 1.325                                          | 15.0         | 60.0      | 72               | 0.800       | 15.0         | 40.0      |                  |                  |      |      |  |
| Brand 2          | MIN. | 30          | 0.500        | 10.0      | 35.0             | 140        | 0.800        | 13.0      | 50.0             | 103             | 1.400        | 19.0      | 70.0             | 125          | 1.350        | 18.0      | 65.0             | 95            | 1.150        | 11.0      | 55.0             |               |              |           | 145              | 1.500            | 19.0         | 65.0      | 120              | 1.325                                          | 15.0         | 60.0      | 72               | 0.800       | 15.0         | 40.0      |                  |                  |      |      |  |
| Brand 2          | MAX. | 35          | 0.900        | 13.0      | 45.0             | 155        | 1.050        | 16.0      | 50.0             | 130             | 1.800        | 21.0      | 70.0             | 140          | 1.750        | 19.0      | 65.0             | 95            | 1.150        | 11.0      | 55.0             |               |              |           | 145              | 1.500            | 19.0         | 65.0      | 120              | 1.325                                          | 15.0         | 60.0      | 72               | 0.800       | 15.0         | 40.0      |                  |                  |      |      |  |
| Brand 6, Model a |      | 40          | 0.600        | 11.5      | 40.0             | 195        | 0.830        | 10.0      | 45.0             | 175             | 1.600        | 18.0      | 65.0             | 185          | 1.300        | 14.0      | 55.0             | 120           | 0.900        | 8.4       | 45.0             | 180           | 1.300        | 16.0      | 55.0             |                  |              | 150       | 1.100            | 12.2                                           | 50.0         | 115       | 0.870            | 14.0        | 45.0         | 60        | 1.150            | 10.0             | 60.0 |      |  |
| Brand 6, Model b |      | 40          | 0.750        | 11.5      | 45.0             | 190        | 0.970        | 11.0      | 45.0             | 160             | 1.500        | 18.5      | 60.0             | 180          | 1.250        | 15.0      | 55.0             |               |              |           |                  |               |              |           |                  |                  |              |           |                  |                                                |              |           |                  |             |              |           |                  |                  |      |      |  |
| Brand 6, Model c |      | 30          | 0.750        | 11.0      | 45.0             | 190        | 0.900        | 11.0      | 45.0             | 170             | 1.600        | 18.5      | 60.0             | 180          | 1.300        | 15.0      | 55.0             |               |              |           |                  |               |              |           |                  |                  |              |           |                  |                                                |              |           |                  |             |              |           |                  |                  |      |      |  |
| Brand 6, Model d |      | 40          | 0.600        | 10.0      | 40.0             | 175        | 0.920        | 10.0      | 50.0             | 175             | 1.600        | 17.0      | 70.0             | 185          | 1.300        | 14.0      | 55.0             |               |              |           |                  |               |              |           |                  |                  |              |           |                  |                                                |              |           |                  |             |              |           |                  |                  |      |      |  |
| Brand 6, Model e |      | 40          | 0.600        | 10.0      | 40.0             | 175        | 0.920        | 10.0      | 50.0             | 175             | 1.600        | 17.0      | 70.0             |              |              |           |                  | 150           | 0.900        | 8.4       | 45.0             | 150           | 1.300        | 12.7      | 55.0             |                  |              | 150       | 1.100            | 10.6                                           | 50.0         | 115       | 0.870            | 14.0        | 45.0         | 60        | 1.150            | 10.0             | 60.0 |      |  |
| Brand 6          | avg. | 38          | 0.660        | 10.8      | 42.0             | 185        | 0.908        | 10.4      | 47.0             | 171             | 1.580        | 17.8      | 65.0             | 183          | 1.288        | 14.5      | 55.0             | 135           | 0.900        | 8.4       | 45.0             | 165           | 1.300        | 14.4      | 55.0             |                  |              | 150       | 1.100            | 11.4                                           | 50.0         | 116       | 0.865            | 14.1        | 43.8         | 78        | 1.270            | 11.4             | 62.0 |      |  |
| Brand 6          | MIN. | 30          | 0.600        | 10.0      | 40.0             | 175        | 0.830        | 10.0      | 45.0             | 160             | 1.500        | 17.0      | 60.0             | 180          | 1.250        | 14.0      | 55.0             | 120           | 0.900        | 8.4       | 45.0             | 150           | 1.300        | 12.7      | 55.0             |                  |              | 150       | 1.100            | 10.6                                           | 50.0         | 115       | 0.850            | 14.0        | 40.0         | 60        | 1.150            | 10.0             | 60.0 |      |  |
| Brand 6          | MAX. | 40          | 0.750        | 11.5      | 45.0             | 195        | 0.970        | 11.0      | 50.0             | 175             | 1.600        | 18.5      | 70.0             | 185          | 1.300        | 15.0      | 55.0             | 150           | 0.900        | 8.4       | 45.0             | 180           | 1.300        | 16.0      | 55.0             |                  |              | 150       | 1.100            | 12.2                                           | 50.0         | 120       | 0.870            | 14.5        | 45.0         | 90        | 1.350            | 12.5             | 65.0 |      |  |
| Brand 3, Model a |      | 30          | 0.800        | 10.8      | 35.0             | 220        | 0.930        | 9.5       | 50.0             | 170             | 1.510        | 16.8      | 70.0             |              |              |           |                  | 110           | 0.900        | 9.4       | 40.0             |               |              |           | 178              | 1.450            | 12.4         | 65.0      | 144              | 1.175                                          | 10.9         | 52.5      | 120              | 1.200       | 13.6         | 40.0      | 58               | 1.180            | 10.6 | 60.0 |  |
| Brand 3, Model b |      | 30          | 0.800        | 10.8      | 35.0             | 220        | 0.930        | 9.5       | 50.0             | 170             | 1.510        | 16.8      | 70.0             |              |              |           |                  | 110           | 0.900        | 9.4       | 40.0             |               |              |           | 178              | 1.450            | 12.4         | 65.0      | 144              | 1.175                                          | 10.9         | 52.5      | 120              | 1.200       | 13.6         | 40.0      | 58               | 1.180            | 10.6 | 60.0 |  |
| Brand 3, Model c |      | 30          | 0.790        | 11.8      | 35.0             | 190        | 1.020        | 12.0      | 50.0             | 124             | 1.700        | 17.6      | 70.0             |              |              |           |                  | 92            | 1.090        | 12.6      | 40.0             |               |              |           | 176              | 1.840            | 17.0         | 65.0      | 134              | 1.465                                          | 14.8         | 52.5      |                  |             | 58           | 1.320     | 11.6             | 70.0             |      |      |  |
| Brand 3, Model d |      | 30          | 0.800        | 10.4      | 50.0             | 171        | 0.940        | 10.0      | 60.0             | 143             | 1.260        | 16.2      | 70.0             |              |              |           |                  | 80            | 0.900        | 10.4      | 40.0             |               |              |           | 154              | 1.420            | 14.2         | 65.0      | 117              | 1.160                                          | 12.3         | 52.5      |                  |             | 58           | 1.320     | 10.2             | 60.0             |      |      |  |



|                   |      |      |       |      |      |      |       |      |      |      |       |      |      |      |       |      |      |     |       |      |      |     |       |      |       |      |       |      |       |      |       |      |       |       |         |         |       |      |       |      |      |       |       |      |      |       |       |      |      |       |       |      |      |
|-------------------|------|------|-------|------|------|------|-------|------|------|------|-------|------|------|------|-------|------|------|-----|-------|------|------|-----|-------|------|-------|------|-------|------|-------|------|-------|------|-------|-------|---------|---------|-------|------|-------|------|------|-------|-------|------|------|-------|-------|------|------|-------|-------|------|------|
| Brand 5           | MAX. | 35   | 0.800 | 13.0 | 45.0 | 295  | 1.200 | 17.0 | 55.0 | 175  | 2.000 | 23.0 | 70.0 | 110  | 1.750 | 21.0 | 65.0 | 115 | 1.090 | 10.5 | 45.0 |     |       | 165  | 1.600 | 18.0 | 65.0  | 135  | 1.275 | 12.5 | 55.0  | 105  | 1.000 | 18.0  | 40.0    | 60      | 1.400 | 11.0 | 65.0  |      |      |       |       |      |      |       |       |      |      |       |       |      |      |
| Brand 26          |      | 50.0 |       |      |      | 45.0 |       |      |      | 70.0 |       |      |      | 50.0 |       |      |      |     |       |      |      |     |       |      |       |      |       |      |       |      |       |      |       | 60    |         |         |       | 70.0 |       |      |      |       |       |      |      |       |       |      |      |       |       |      |      |
| Brand 7, Model a  |      | 30   | 0.800 | 9.0  | 60.0 | 237  | 0.820 | 9.9  | 50.0 | 140  | 1.400 | 13.0 | 70.0 |      |       |      |      | 45  | 0.700 | 7.0  | 45.0 |     |       |      |       | 160  | 1.500 | 12.0 | 70.0  | 103  | 1.100 | 9.5  | 57.5  | 78    | 1.000   | 13.5    | 45.0  |      |       |      |      |       |       |      |      |       |       |      |      |       |       |      |      |
| Brand 7, Model b  |      | 30   | 0.800 | 9.0  | 60.0 | 237  | 0.820 | 9.9  | 50.0 | 160  | 1.600 | 15.0 | 70.0 |      |       |      |      | 45  | 0.700 | 7.0  | 45.0 |     |       |      |       | 160  | 1.500 | 12.0 | 70.0  | 103  | 1.100 | 9.5  | 57.5  | 78    | 1.000   | 13.5    | 45.0  |      |       |      |      |       |       |      |      |       |       |      |      |       |       |      |      |
| Brand 7, Model c  |      | 30   | 0.900 | 10.0 | 60.0 | 235  | 0.950 | 11.0 | 50.0 | 190  | 1.700 | 14.5 | 70.0 |      |       |      |      |     |       |      |      |     |       |      |       |      |       |      |       |      |       |      |       | 92    | 0.900   | 14.0    | 45.0  |      |       |      |      |       |       |      |      |       |       |      |      |       |       |      |      |
| Brand 7, Model d  |      | 30   | 0.611 | 10.0 | 50.0 | 141  | 1.000 | 15.0 | 50.0 | 125  | 1.800 | 24.0 | 70.0 |      |       |      |      |     |       |      |      |     |       |      |       |      |       |      |       |      |       |      |       | 113   | 1.750   | 25.0    | 65.0  |      |       |      |      |       |       |      |      |       |       |      |      |       |       |      |      |
| Brand 7           | avg. | 30   | 0.778 | 9.5  | 57.5 | 213  | 0.898 | 11.5 | 50.0 | 154  | 1.625 | 16.6 | 70.0 | 113  | 1.750 | 25.0 | 65.0 | 45  | 0.700 | 7.0  | 45.0 |     |       |      |       | 160  | 1.500 | 12.0 | 70.0  | 103  | 1.100 | 9.5  | 57.5  | 82    | 0.967   | 13.7    | 45.0  |      |       |      |      |       |       |      |      |       |       |      |      |       |       |      |      |
| Brand 7           | MIN. | 30   | 0.611 | 9.0  | 50.0 | 141  | 0.820 | 9.9  | 50.0 | 125  | 1.400 | 13.0 | 70.0 | 113  | 1.750 | 25.0 | 65.0 | 45  | 0.700 | 7.0  | 45.0 |     |       |      |       | 160  | 1.500 | 12.0 | 70.0  | 103  | 1.100 | 9.5  | 57.5  | 78    | 0.900   | 13.5    | 45.0  |      |       |      |      |       |       |      |      |       |       |      |      |       |       |      |      |
| Brand 7           | MAX. | 30   | 0.900 | 10.0 | 60.0 | 237  | 1.000 | 15.0 | 50.0 | 190  | 1.800 | 24.0 | 70.0 | 113  | 1.750 | 25.0 | 65.0 | 45  | 0.700 | 7.0  | 45.0 |     |       |      |       | 160  | 1.500 | 12.0 | 70.0  | 103  | 1.100 | 9.5  | 57.5  | 92    | 1.000   | 14.0    | 45.0  |      |       |      |      |       |       |      |      |       |       |      |      |       |       |      |      |
| Brand 8, Model a  |      | 30   | 0.750 | 11.0 | 45.0 | 235  | 0.691 | 9.0  | 45.0 | 205  | 1.378 | 15.3 | 65.0 | 175  | 1.287 | 13.1 | 55.0 |     |       |      |      |     |       |      |       |      |       |      |       |      |       |      |       |       |         |         |       |      |       |      |      |       |       |      |      |       |       |      |      |       |       |      |      |
| Brand 8, Model b  |      | 30   | 0.750 | 11.0 | 45.0 | 190  | 0.910 | 11.0 | 45.0 | 170  | 1.600 | 18.5 | 60.0 | 180  | 1.300 | 15.0 | 55.0 |     |       |      |      |     |       |      |       |      |       |      |       |      |       |      |       |       |         |         |       |      |       |      |      |       |       |      |      |       |       |      |      |       |       |      |      |
| Brand 8           | avg. | 30   | 0.750 | 11.0 | 45.0 | 213  | 0.801 | 10.0 | 45.0 | 188  | 1.489 | 16.9 | 62.5 | 178  | 1.294 | 14.1 | 55.0 |     |       |      |      |     |       |      |       |      |       |      |       |      |       |      |       |       |         |         |       |      |       |      |      |       |       |      |      |       |       |      |      |       |       |      |      |
| Brand 8           | MIN. | 30   | 0.750 | 11.0 | 45.0 | 190  | 0.691 | 9.0  | 45.0 | 170  | 1.378 | 15.3 | 60.0 | 175  | 1.287 | 13.1 | 55.0 |     |       |      |      |     |       |      |       |      |       |      |       |      |       |      |       |       |         |         |       |      |       |      |      |       |       |      |      |       |       |      |      |       |       |      |      |
| Brand 8           | MAX. | 30   | 0.750 | 11.0 | 45.0 | 235  | 0.910 | 11.0 | 45.0 | 205  | 1.600 | 18.5 | 65.0 | 180  | 1.300 | 15.0 | 55.0 |     |       |      |      |     |       |      |       |      |       |      |       |      |       |      |       |       |         |         |       |      |       |      |      |       |       |      |      |       |       |      |      |       |       |      |      |
| Brand 13, Model a |      | 30   | 0.750 | 11.0 | 45.0 | 220  | 0.849 | 10.0 | 45.0 | 175  | 1.600 | 17.5 | 60.0 | 185  | 1.300 | 13.5 | 55.0 | 150 | 0.900 | 11.0 | 45.0 | 150 | 1.300 | 15.0 | 55.0  |      |       |      |       | 150  | 1.100 | 13.0 | 50.0  | 130   | 0.900   | 13.0    | 40.0  |      |       |      |      |       |       |      |      |       |       |      |      |       |       |      |      |
| Brand 13, Model b |      | 30   | 0.670 | 10.0 |      | 190  | 0.930 | 11.0 | 45.0 | 170  | 1.600 | 18.5 | 60.0 | 180  | 1.300 | 15.0 | 55.0 | 150 | 0.900 | 11.0 | 45.0 | 150 | 1.300 | 15.0 | 55.0  |      |       |      |       | 150  | 1.100 | 13.0 | 50.0  | 130   | 0.900   | 14.5    | 40.0  |      |       |      |      |       |       |      |      |       |       |      |      |       |       |      |      |
| Brand 13, Model c |      | 30   | 1.000 | 12.0 | 35.0 |      |       |      |      |      |       |      |      |      |       |      |      |     |       |      |      |     |       |      |       |      |       |      |       |      |       |      |       |       |         |         |       |      |       |      |      |       |       |      |      |       |       |      |      |       |       |      |      |
| Brand 13          | avg. | 30   | 0.807 | 11.0 | 40.0 |      |       |      |      |      |       |      |      |      |       |      |      |     |       |      |      |     |       |      |       |      |       |      |       |      |       |      |       |       |         |         |       |      |       |      |      | 205   | 0.890 | 10.5 | 45.0 | 173   | 1.600 | 18.0 | 60.0 | 183   | 1.300 | 14.3 | 55.0 |
| Brand 13          | MIN. | 30   | 0.670 | 10.0 | 35.0 | 190  | 0.849 | 10.0 | 45.0 | 170  | 1.600 | 17.5 | 60.0 | 180  | 1.300 | 13.5 | 55.0 | 150 | 0.900 | 11.0 | 45.0 | 150 | 1.300 | 15.0 | 55.0  |      |       |      |       | 150  | 1.100 | 13.0 | 50.0  | 130   | 0.900   | 13.0    | 40.0  |      |       |      |      |       |       |      |      |       |       |      |      |       |       |      |      |
| Brand 13          | MAX. | 30   | 1.000 | 12.0 | 45.0 | 220  | 0.930 | 11.0 | 45.0 | 175  | 1.600 | 18.5 | 60.0 | 185  | 1.300 | 15.0 | 55.0 | 150 | 0.900 | 11.0 | 45.0 | 150 | 1.300 | 15.0 | 55.0  |      |       |      |       | 150  | 1.100 | 13.0 | 50.0  | 130   | 0.900   | 14.5    | 40.0  |      |       |      |      |       |       |      |      |       |       |      |      |       |       |      |      |
| Brand 27, Model a |      | 27   | 0.400 | 6.5  |      | 70   | 0.900 | 12.5 |      | 122  | 1.120 | 18.3 | 70.0 | 100  | 0.700 | 12.0 | 50.0 |     |       |      |      |     |       |      |       |      |       |      |       |      |       |      |       | 65    | 0.500   | 12.0    | 45.0  | 55   | 1.000 | 9.5  | 65.0 |       |       |      |      |       |       |      |      |       |       |      |      |
| Brand 27, Model b |      | 37   | 0.700 | 12.0 | 40.0 |      |       |      |      | 115  | 1.850 | 21.0 | 70.0 | 95   | 1.250 | 18.0 | 65.0 |     |       |      |      |     |       |      |       |      |       |      |       |      |       |      |       |       |         |         |       |      |       |      |      |       |       |      |      |       |       |      |      |       |       |      |      |
| Brand 27, Model c |      | 30   | 0.900 | 10.0 | 60.0 | 195  | 0.920 | 9.5  | 50.0 | 155  | 1.450 | 13.5 | 70.0 |      |       |      |      | 90  | 0.900 | 8.0  | 45.0 |     |       |      |       | 160  | 1.700 | 15.0 | 70.0  | 125  | 1.300 | 11.5 | 57.5  | 70-80 | 0.7-0.9 | 11-12.0 | 45.0  |      |       |      |      |       |       |      |      |       |       |      |      |       |       |      |      |
| Brand 27, Model d |      | 30   | 0.800 | 10.0 | 60.0 | 195  | 0.820 | 10.2 | 50.0 | 155  | 1.500 | 14.0 | 70.0 |      |       |      |      | 40  | 0.600 | 7.0  | 45.0 |     |       |      |       | 150  | 1.400 | 14.0 | 70.0  | 95   | 1.000 | 10.5 | 57.5  | 70-80 | 0.8-0.9 | 11-12.0 | 45.0  |      |       |      |      | 60    | 1.100 | 10.5 | 60.0 |       |       |      |      |       |       |      |      |
| Brand 27, Model e |      | 30   |       |      | 35.0 |      |       |      |      |      |       |      |      |      |       |      |      |     |       |      |      |     |       |      |       |      |       |      |       |      |       |      |       |       |         |         |       |      |       |      |      |       |       |      |      |       |       |      |      |       |       |      |      |
| Brand 27, Model f |      | 30   | 0.800 | 9.0  | 60.0 |      |       |      |      |      |       |      |      |      |       |      |      |     |       |      |      |     |       |      |       |      |       |      |       |      |       |      |       |       |         |         |       |      |       |      | 145  | 1.000 | 14.0  | 50.0 | 125  | 1.900 | 23.0  | 70.0 | 90   | 1.000 | 12.0  | 50.0 | 110  |
| Brand 27          | avg. | 31   | 0.720 | 9.5  | 51.0 | 151  | 0.910 | 11.6 | 50.0 | 134  | 1.564 | 18.0 | 70.0 | 98   | 0.975 | 15.0 | 57.5 | 73  | 0.833 | 9.0  | 46.7 |     |       |      |       | 140  | 1.533 | 17.7 | 68.3  | 107  | 1.183 | 13.3 | 57.5  | 65    | 0.500   | 12.0    | 45.0  | 58   | 1.050 | 10.0 | 62.5 |       |       |      |      |       |       |      |      |       |       |      |      |
| Brand 27          | MIN. | 27   | 0.400 | 6.5  | 35.0 | 70   | 0.820 | 9.5  | 50.0 | 115  | 1.120 | 13.5 | 70.0 | 95   | 0.700 | 12.0 | 50.0 | 40  | 0.600 | 7.0  | 45.0 |     |       |      |       | 110  | 1.400 | 14.0 | 65.0  | 95   | 1.000 | 10.5 | 57.5  | 65    | 0.500   | 12.0    | 45.0  | 55   | 1.000 | 9.5  | 60.0 |       |       |      |      |       |       |      |      |       |       |      |      |
| Brand 27          | MAX. | 37   | 0.900 | 12.0 | 60.0 | 195  | 1.000 | 14.0 | 50.0 | 155  | 1.900 | 23.0 | 70.0 | 100  | 1.250 | 18.0 | 65.0 | 90  | 1.000 | 12.0 | 50.0 |     |       |      |       | 160  | 1.700 | 24.0 | 70.0  | 125  | 1.300 | 18.0 | 57.5  | 65    | 0.500   | 12.0    | 45.0  | 60   | 1.100 | 10.5 | 65.0 |       |       |      |      |       |       |      |      |       |       |      |      |
| Brand 28          |      |      |       |      |      | 205  | 0.760 | 9.6  | 55.0 | 175  | 1.600 | 15.0 | 70.0 |      |       |      |      | 130 | 0.900 | 9.0  | 50.0 |     |       |      |       | 170  | 1.500 | 18.0 | 65.0  | 150  | 1.200 | 13.5 | 57.5  | 100   | 0.700   | 8.5     | 45.0  | 60   | 0.800 | 8.5  | 65.0 |       |       |      |      |       |       |      |      |       |       |      |      |
| Brand 29          |      | 40   | 0.750 | 11.5 | 45.0 | 185  | 0.914 | 11.0 | 45.0 | 160  | 1.500 | 18.5 | 60.0 | 180  | 1.250 | 15.0 | 55.0 |     |       |      |      |     |       |      |       |      |       |      |       |      |       |      |       | 120   | 0.850   | 14.5    | 40.0  | 90   | 1.350 | 12.5 | 65.0 |       |       |      |      |       |       |      |      |       |       |      |      |
| Brand 9, Model a  |      |      |       |      |      |      |       |      |      |      |       |      |      |      |       |      |      |     |       |      |      |     |       |      |       |      |       |      |       | 170  | 1.500 | 18.0 | 65.0  | 150   | 1.200   | 13.5    | 57.5  |      |       |      |      |       |       |      |      |       |       |      |      |       |       |      |      |
| Brand 9, Model b  |      |      |       |      |      |      |       |      |      |      |       |      |      |      |       |      |      |     |       |      |      |     |       |      |       |      |       |      |       |      |       |      |       |       |         |         |       |      |       |      |      |       |       |      |      |       |       |      |      |       |       |      |      |
| Brand 9, Model c  |      |      |       |      |      |      |       |      |      |      |       |      |      |      |       |      |      |     |       |      |      |     |       |      |       |      |       |      |       | 30   | 0.700 | 10.0 | 55.0  | 195   | 0.740   | 8.0     | 45.0  |      |       |      |      |       |       |      |      | 170   | 1.400 | 15.5 | 70.0 | 180   | 1.100 | 12.0 | 55.0 |
| Brand 9, Model d  |      |      |       |      |      |      |       |      |      |      |       |      |      |      |       |      |      |     |       |      |      |     |       |      |       |      |       |      |       | 29   | 0.730 | 9.0  | 50.0  | 190   | 1.040   | 12.0    | 45.0  |      |       |      |      |       |       |      |      | 130   | 2.080 | 20.5 | 75.0 | 120   | 1.530 | 14.5 | 60.0 |
|                   |      | 24   | 0.590 | 9.0  | 50.0 | 170  | 1.040 | 11.0 | 45.0 | 130  | 2.080 | 20.5 | 75.0 | 120  | 1.530 | 14.5 | 60.0 |     |       |      |      |     |       |      |       |      |       |      |       |      |       |      |       | 85    |         | 45.0    |       |      |       |      | 55.0 |       |       |      |      |       |       |      |      |       |       |      |      |

|                   |      |    |       |      |      |     |       |      |      |     |       |      |      |         |           |       |      |     |       |     |      |       |      |      |       |       |      |      |       |       |      |      |       |      |       |       |       |      |      |
|-------------------|------|----|-------|------|------|-----|-------|------|------|-----|-------|------|------|---------|-----------|-------|------|-----|-------|-----|------|-------|------|------|-------|-------|------|------|-------|-------|------|------|-------|------|-------|-------|-------|------|------|
| Brand 9           | avg. | 28 | 0.673 | 9.3  | 51.7 | 185 | 0.940 | 10.3 | 45.0 | 143 | 1.853 | 18.8 | 73.3 | 140     | 1.387     | 13.7  | 58.3 |     |       |     |      |       |      | 105  | 0.750 | 12.0  | 42.5 |      | 60.0  |       |      |      |       |      |       |       |       |      |      |
|                   | MIN. | 24 | 0.590 | 9.0  | 50.0 | 170 | 0.740 | 8.0  | 45.0 | 130 | 1.400 | 15.5 | 70.0 | 120     | 1.100     | 12.0  | 55.0 |     |       |     |      |       |      | 85   | 0.750 | 12.0  | 40.0 |      | 55.0  |       |      |      |       |      |       |       |       |      |      |
|                   | MAX. | 30 | 0.730 | 10.0 | 55.0 | 195 | 1.040 | 12.0 | 45.0 | 170 | 2.080 | 20.5 | 75.0 | 180     | 1.530     | 14.5  | 60.0 |     |       |     |      |       |      | 125  | 0.750 | 12.0  | 45.0 |      | 65.0  |       |      |      |       |      |       |       |       |      |      |
| Brand 10, Model a |      | 30 | 0.450 | 8.5  | 50.0 | 190 | 1.040 | 11.0 | 50.0 | 150 | 1.700 | 16.5 | 65.0 | 120     | 1.350     | 16.0  | 55.0 |     |       |     |      |       |      | 90   | 1.100 | 12.0  |      |      |       |       |      |      |       |      |       |       |       |      |      |
| Brand 10, Model b |      | 30 | 0.500 | 8.5  | 50.0 | 200 | 1.040 | 12.0 | 50.0 | 150 | 1.500 | 15.0 | 65.0 | 120     | 1.350     | 15.0  | 55.0 |     |       |     |      |       |      |      |       |       |      |      |       |       |      |      |       |      |       |       |       |      |      |
| Brand 10, Model c |      | 30 | 0.600 | 10.0 | 35.0 | 130 | 1.050 | 14.0 | 50.0 | 112 | 1.600 | 21.0 | 70.0 | 110-130 | 1.25-1.35 | 14-19 | 65.0 |     |       |     |      |       |      |      |       |       |      |      |       |       |      |      |       |      |       |       |       |      |      |
| Brand 10, Model d |      | 26 |       |      | 35.0 | 120 |       |      | 45.0 | 120 |       |      | 65.0 | 72      |           |       | 55.0 |     |       |     |      |       |      |      |       |       |      |      |       |       |      |      |       |      |       |       |       |      |      |
| Brand 10, Model e |      | 30 | 0.450 | 8.5  |      | 138 | 1.040 | 11.0 |      | 150 | 1.700 | 16.5 |      | 120     | 1.350     | 16.0  |      |     |       |     |      |       |      | 90   | 1.100 | 12.0  |      | 60   | 1.100 | 11.5  |      |      |       |      |       |       |       |      |      |
| Brand 10, Model f |      | 25 |       |      |      |     |       |      |      | 150 | 1.500 | 15.0 |      | 120     | 1.200     | 15.0  |      |     |       |     |      |       |      | 90   |       |       |      |      |       |       |      |      |       |      |       |       |       |      |      |
| Brand 10, Model g |      | 40 | 0.800 | 9.0  |      | 180 | 0.900 | 10.0 |      | 150 | 1.300 | 15.0 |      | 120     | 1.100     | 13.5  |      |     |       |     |      |       |      |      |       |       |      |      |       |       |      |      |       |      |       |       |       |      |      |
| Brand 10, Model h |      | 30 | 0.500 | 9.0  |      | 190 | 0.830 | 9.0  |      | 120 | 1.400 | 14.0 |      | 90      | 1.150     | 14.5  |      |     |       |     |      |       |      | 100  | 1.050 | 11.0  |      | 40   | 1.150 | 13.0  |      |      |       |      |       |       |       |      |      |
| Brand 10, Model i |      | 30 | 0.500 | 9.0  |      | 190 | 0.830 | 9.0  |      | 190 | 1.700 | 15.5 |      | 150     | 1.300     | 16.0  |      |     |       |     |      |       |      | 100  | 1.050 | 11.0  |      | 80   | 1.250 | 14.5  |      |      |       |      |       |       |       |      |      |
| Brand 10          | avg. | 30 | 0.543 | 8.9  | 42.5 | 167 | 0.961 | 10.9 | 48.8 | 144 | 1.550 | 16.1 | 66.3 | 114     | 1.257     | 15.1  | 57.5 |     |       |     |      |       |      | 94   | 1.075 | 11.5  |      | 60   | 1.167 | 13.0  |      |      |       |      |       |       |       |      |      |
| Brand 10          | MIN. | 25 | 0.450 | 8.5  | 35.0 | 120 | 0.830 | 9.0  | 45.0 | 112 | 1.300 | 14.0 | 65.0 | 72      | 1.100     | 13.5  | 55.0 |     |       |     |      |       |      | 90   | 1.050 | 11.0  |      | 40   | 1.100 | 11.5  |      |      |       |      |       |       |       |      |      |
| Brand 10          | MAX. | 40 | 0.800 | 10.0 | 50.0 | 200 | 1.050 | 14.0 | 50.0 | 190 | 1.700 | 21.0 | 70.0 | 150     | 1.350     | 16.0  | 65.0 |     |       |     |      |       |      | 100  | 1.100 | 12.0  |      | 80   | 1.250 | 14.5  |      |      |       |      |       |       |       |      |      |
| Brand 11, Model a |      | 41 | 0.900 | 10.0 | 60.0 | 232 | 0.860 | 11.0 | 50.0 | 170 | 1.400 | 12.5 | 70.0 |         |           |       |      | 40  | 0.600 | 7.0 | 45.0 |       |      | 170  | 1.600 | 14.0  | 70.0 | 105  | 1.100 | 10.5  | 57.5 | 92   | 0.900 | 14.0 | 45.0  |       |       |      |      |
| Brand 11, Model b |      |    |       |      |      |     |       |      |      | 190 | 1.700 | 14.5 | 70.0 |         |           |       |      | 40  | 0.600 | 7.0 | 45.0 |       |      |      | 170   | 1.600 | 14.0 | 70.0 | 105   | 1.100 | 10.5 | 57.5 |       |      |       |       |       |      |      |
| Brand 11, Model c |      | 30 | 0.560 | 9.3  | 50.0 | 240 | 0.657 | 9.9  | 50.0 | 160 | 0.876 | 9.4  | 60.0 | 90      | 0.772     | 9.3   | 60.0 | 120 | 0.677 | 8.3 | 50.0 |       |      |      | 170   | 1.036 | 11.5 | 60.0 | 145   | 0.857 | 9.9  | 55.0 |       |      | 60    | 0.693 | 9.0   | 60.0 |      |
| Brand 11, Model d |      |    |       |      |      |     |       |      |      | 160 | 1.071 | 11.5 | 60.0 | 90      | 0.944     | 11.4  | 60.0 |     |       |     |      |       |      |      |       |       |      |      |       |       |      |      |       | 60   | 0.847 | 11.0  | 60.0  |      |      |
| Brand 11, Model e |      | 30 | 0.800 | 9.0  | 60.0 | 195 | 1.030 | 12.0 | 50.0 | 130 | 1.300 | 13.0 | 70.0 | 105     | 1.400     | 15.5  | 65.0 |     |       |     |      |       |      |      |       |       |      |      |       |       |      |      |       |      |       |       |       |      |      |
| Brand 11, Model f |      |    |       |      |      |     |       |      |      | 150 | 1.400 | 15.0 | 70.0 |         |           |       |      |     |       |     |      |       |      |      |       |       |      |      |       |       |      |      |       |      |       |       |       |      |      |
| Brand 11, Model g |      | 38 | 0.700 | 9.0  | 60.0 | 240 | 0.921 | 9.9  | 50.0 | 154 | 1.400 | 13.0 | 70.0 |         |           |       |      | 45  | 0.700 | 7.0 | 45.0 |       |      |      | 160   | 1.500 | 12.0 | 70.0 | 103   | 1.100 | 9.5  | 57.5 |       |      |       |       |       |      |      |
| Brand 11, Model h |      |    |       |      |      |     |       |      |      | 174 | 1.600 | 15.0 | 70.0 |         |           |       |      |     |       |     |      |       |      |      |       |       |      |      |       |       |      |      |       |      |       |       |       |      |      |
| Brand 11, Model i |      | 30 | 0.700 | 13.0 | 40.0 | 195 | 1.050 | 16.0 | 50.0 | 145 | 1.650 | 17.0 | 70.0 |         |           |       |      |     |       |     |      |       |      |      |       |       |      |      |       |       |      |      |       |      |       |       |       |      |      |
| Brand 11          | avg. | 34 | 0.732 | 10.1 | 54.0 | 220 | 0.904 | 11.8 | 50.0 | 159 | 1.377 | 13.4 | 67.8 | 95      | 1.039     | 12.1  | 61.7 | 61  | 0.644 | 7.3 | 46.3 |       |      | 168  | 1.434 | 12.9  | 67.5 | 114  | 1.039 | 10.1  | 56.9 | 92   | 0.900 | 14.0 | 45.0  | 60    | 0.770 | 10.0 | 60.0 |
| Brand 11          | MIN. | 30 | 0.560 | 9.0  | 40.0 | 195 | 0.657 | 9.9  | 50.0 | 130 | 0.876 | 9.4  | 60.0 | 90      | 0.772     | 9.3   | 60.0 | 40  | 0.600 | 7.0 | 45.0 |       |      | 160  | 1.036 | 11.5  | 60.0 | 103  | 0.857 | 9.5   | 55.0 | 92   | 0.900 | 14.0 | 45.0  | 60    | 0.693 | 9.0  | 60.0 |
| Brand 11          | MAX. | 41 | 0.900 | 13.0 | 60.0 | 240 | 1.050 | 16.0 | 50.0 | 190 | 1.700 | 17.0 | 70.0 | 105     | 1.400     | 15.5  | 65.0 | 120 | 0.700 | 8.3 | 50.0 |       |      | 170  | 1.600 | 14.0  | 70.0 | 145  | 1.100 | 10.5  | 57.5 | 92   | 0.900 | 14.0 | 45.0  | 60    | 0.847 | 11.0 | 60.0 |
| Brand 12, Model a |      | 28 | 0.500 | 9.0  |      | 190 | 0.830 | 9.5  |      |     |       |      |      |         |           |       |      |     |       |     |      |       |      | 100  | 1.200 | 11.5  |      |      |       |       |      |      |       |      |       |       |       |      |      |
| Brand 12, Model b |      | 40 | 0.900 | 9.5  |      | 190 | 1.030 | 11.0 |      | 120 | 1.500 | 14.0 |      | 90      | 1.200     | 14.5  |      |     |       |     |      |       |      |      |       |       |      |      |       |       |      |      |       |      |       |       |       |      |      |
| Brand 12, Model c |      |    |       |      |      |     |       |      |      | 190 | 1.800 | 15.5 |      | 150     | 1.350     | 16.0  |      |     |       |     |      |       |      |      |       |       |      |      |       |       |      |      |       |      |       |       |       |      |      |
| Brand 12, Model d |      | 28 | 0.500 | 9.0  | 45.0 | 200 | 1.040 | 12.0 | 50.0 | 150 | 1.500 | 15.0 | 65.0 | 120     | 1.350     | 15.0  | 55.0 |     |       |     |      |       |      |      |       |       |      |      |       |       |      |      |       |      |       |       |       |      |      |
| Brand 12, Model e |      | 25 | 0.500 | 8.5  |      | 180 | 0.830 | 10.0 |      | 150 | 1.300 | 14.0 |      | 120     | 1.100     | 13.5  |      |     |       |     |      |       |      | 100  | 0.950 | 10.0  | 40.0 |      | 60    | 0.950 | 10.5 |      |       |      |       |       |       |      |      |
| Brand 12, Model f |      | 40 | 0.900 | 9.5  | 50.0 | 190 | 1.040 | 11.0 | 50.0 | 150 | 1.700 | 16.5 | 65.0 | 120     | 1.350     | 16.0  | 55.0 |     |       |     |      |       |      |      |       |       |      |      |       |       |      |      |       |      |       |       |       |      |      |
| Brand 12, Model g |      | 40 | 0.900 | 9.0  | 50.0 | 138 | 1.040 | 11.0 | 50.0 | 150 | 1.650 | 16.5 | 65.0 | 120     | 1.300     | 16.0  | 55.0 |     |       |     |      |       |      | 90   | 1.100 | 12.0  | 45.0 |      | 60    | 1.100 | 11.5 |      |       |      |       | 50.0  |       |      |      |
| Brand 12, Model h |      | 28 | 0.600 | 9.0  | 45.0 | 200 | 1.040 | 12.0 | 50.0 | 150 | 1.040 | 12.0 | 65.0 | 85      | 1.100     | 11.5  | 50.0 |     |       |     | 145  | 1.350 | 16.0 | 55.0 |       |       |      | 145  | 1.350 | 16.0  | 55.0 |      |       |      |       |       |       |      |      |

|                   |      |    |       |      |      |     |       |      |      |     |       |      |      |     |       |       |      |      |       |       |      |      |       |       |       |      |       |       |       |       |       |       |       |       |       |       |       |      |       |      |      |
|-------------------|------|----|-------|------|------|-----|-------|------|------|-----|-------|------|------|-----|-------|-------|------|------|-------|-------|------|------|-------|-------|-------|------|-------|-------|-------|-------|-------|-------|-------|-------|-------|-------|-------|------|-------|------|------|
| Brand 12          | avg. | 33 | 0.686 | 9.1  | 47.5 | 184 | 0.979 | 10.9 | 50.0 | 151 | 1.499 | 14.8 | 65.0 | 115 | 1.250 | 14.6  | 53.8 |      | 145   | 1.350 | 16.0 | 55.0 |       | 145   | 1.350 | 16.0 | 55.0  | 97    | 1.083 | 11.2  | 42.5  | 60    | 1.025 | 11.0  |       |       |       |      |       |      |      |
| Brand 12          | MIN. | 25 | 0.500 | 8.5  | 45.0 | 138 | 0.830 | 9.5  | 50.0 | 120 | 1.040 | 12.0 | 65.0 | 85  | 1.100 | 11.5  | 50.0 |      | 145   | 1.350 | 16.0 | 55.0 |       | 145   | 1.350 | 16.0 | 55.0  | 90    | 0.950 | 10.0  | 40.0  | 60    | 0.950 | 10.5  |       |       |       |      |       |      |      |
| Brand 12          | MAX. | 40 | 0.900 | 9.5  | 50.0 | 200 | 1.040 | 12.0 | 50.0 | 190 | 1.800 | 16.5 | 65.0 | 150 | 1.350 | 16.0  | 55.0 |      | 145   | 1.350 | 16.0 | 55.0 |       | 145   | 1.350 | 16.0 | 55.0  | 100   | 1.200 | 12.0  | 45.0  | 60    | 1.100 | 11.5  |       |       |       |      |       |      |      |
| Brand 14, Model a |      | 33 | 0.700 | 13.0 | 40.0 | 174 | 1.050 | 13.0 | 45.0 | 159 | 1.700 | 17.0 | 75.0 |     |       |       |      |      |       |       |      |      |       |       |       |      |       |       |       |       |       |       |       |       |       |       |       |      |       |      |      |
| Brand 14, Model b |      |    |       |      |      | 227 | 0.940 | 8.9  | 50.0 | 180 | 1.550 | 14.0 | 75.0 |     | 108   | 0.750 | 6.0  | 45.0 |       |       |      |      | 213   | 1.450 | 16.0  | 65.0 | 161   | 1.100 | 11.0  | 55.0  | 149   | 1.100 | 13.5  | 45.0  | 58    | 1.200 | 11.0  | 65.0 |       |      |      |
| Brand 14, Model c |      | 33 | 0.900 | 13.0 | 45.0 | 168 | 1.050 | 13.0 | 45.0 | 144 | 1.700 | 17.0 | 75.0 | 65  | 1.200 | 13.0  | 50.0 |      |       |       |      |      |       |       |       |      |       |       |       |       |       |       |       |       |       |       |       |      |       |      |      |
| Brand 14, Model d |      | 33 | 0.750 | 13.0 | 40.0 | 176 | 1.050 | 13.0 | 45.0 | 162 | 1.650 | 17.0 | 75.0 |     |       |       |      |      | 95    | 1.300 | 13.0 | 55.0 | 136   | 1.600 | 22.0  | 65.0 | 116   | 1.450 | 17.5  | 60.0  |       |       |       |       |       |       |       |      |       |      |      |
| Brand 14, Model e |      | 38 | 0.700 | 13.0 | 40.0 | 174 | 1.050 | 13.0 | 45.0 | 159 | 1.700 | 17.0 | 75.0 | 92  | 1.250 | 13.0  | 50.0 | 95   | 1.100 | 13.0  | 45.0 |      | 154   | 1.600 | 22.0  | 65.0 | 125   | 1.350 | 17.5  | 55.0  |       |       |       |       |       |       |       |      |       |      |      |
| Brand 14, Model f |      | 38 | 0.700 | 13.0 | 40.0 | 174 | 1.050 | 13.0 | 45.0 | 159 | 1.700 | 17.0 | 75.0 | 92  | 1.250 | 13.0  | 50.0 | 95   | 1.100 | 13.0  | 45.0 |      | 154   | 1.600 | 22.0  | 65.0 | 125   | 1.350 | 17.5  | 55.0  |       |       |       |       |       |       |       |      |       |      |      |
| Brand 14, Model g |      | 38 | 0.600 | 10.0 | 40.0 | 172 | 0.940 | 10.0 | 45.0 | 160 | 1.550 | 13.0 | 75.0 |     |       |       |      |      |       |       |      |      |       |       |       |      |       |       | 159   | 0.950 | 10.0  | 40.0  |       |       |       |       |       |      |       |      |      |
| Brand 14, Model h |      |    |       |      |      | 230 | 0.690 | 7.7  | 50.0 | 182 | 1.100 | 12.0 | 75.0 | 58  | 0.950 | 10.0  | 65.0 | 118  | 0.600 | 6.0   | 45.0 |      | 220   | 1.100 | 14.0  | 65.0 | 169   | 0.850 | 10.0  | 55.0  | 149   | 0.800 | 8.5   | 45.0  |       |       |       |      |       |      |      |
| Brand 14, Model i |      |    |       |      |      | 230 | 0.690 | 7.7  | 50.0 | 182 | 1.100 | 12.0 | 75.0 | 58  | 0.950 | 10.0  | 65.0 | 118  | 0.600 | 6.0   | 45.0 |      | 220   | 1.100 | 14.0  | 65.0 | 169   | 0.850 | 10.0  | 55.0  | 149   | 1.000 | 12.0  | 45.0  |       |       |       |      |       |      |      |
| Brand 14, Model j |      |    |       |      |      | 238 | 0.750 | 8.9  | 50.0 | 191 | 1.350 | 14.0 | 75.0 | 144 | 1.000 | 13.0  | 60.0 | 125  | 0.750 | 6.0   | 45.0 |      | 215   | 1.050 | 13.0  | 65.0 | 170   | 0.900 | 9.5   | 55.0  | 164   | 0.900 | 13.0  | 45.0  | 58    | 1.200 | 10.5  | 65.0 |       |      |      |
| Brand 14, Model k |      | 46 | 0.550 | 9.5  | 40.0 | 188 | 0.790 | 8.7  | 44.0 | 174 | 1.300 | 14.0 | 75.0 |     | 80    | 0.700 | 6.5  | 47.0 | 150   | 1.150 | 14.0 | 55.0 |       |       |       |      |       |       |       |       |       |       |       |       | 55.0  |       |       |      |       |      |      |
| Brand 14          | avg. | 38 | 0.700 | 11.9 | 40.8 | 194 | 0.896 | 10.6 | 46.6 | 168 | 1.461 | 14.8 | 75.0 | 85  | 1.100 | 12.0  | 56.7 | 105  | 0.808 | 8.4   | 45.3 | 123  | 1.225 | 13.5  | 55.0  | 183  | 1.342 | 17.8  | 65.0  | 148   | 1.121 | 13.3  | 55.7  | 145   | 0.933 | 11.4  | 44.0  | 58   | 1.200 | 10.8 | 61.7 |
| Brand 14          | MIN. | 33 | 0.550 | 9.5  | 40.0 | 168 | 0.690 | 7.7  | 44.0 | 144 | 1.100 | 12.0 | 75.0 | 58  | 0.950 | 10.0  | 50.0 | 80   | 0.600 | 6.0   | 45.0 | 95   | 1.150 | 13.0  | 55.0  | 136  | 1.050 | 13.0  | 65.0  | 116   | 0.850 | 9.5   | 55.0  | 101   | 0.800 | 8.5   | 40.0  | 58   | 1.200 | 10.5 | 55.0 |
| Brand 14          | MAX. | 46 | 0.900 | 13.0 | 45.0 | 238 | 1.050 | 13.0 | 50.0 | 191 | 1.700 | 17.0 | 75.0 | 144 | 1.250 | 13.0  | 65.0 | 125  | 1.100 | 13.0  | 47.0 | 150  | 1.300 | 14.0  | 55.0  | 220  | 1.600 | 22.0  | 65.0  | 170   | 1.450 | 17.5  | 60.0  | 164   | 1.100 | 13.5  | 45.0  | 58   | 1.200 | 11.0 | 65.0 |
| Brand 30          |      |    |       |      |      |     |       |      |      | 170 | 1.400 | 15.5 | 60.0 | 180 | 0.506 | 11.0  | 45.0 | 150  | 0.900 | 9.5   | 45.0 | 150  | 1.300 | 13.0  | 55.0  |      |       | 150   | 1.100 | 11.3  | 50.0  | 125   | 0.750 | 12.0  | 40.0  | 90    | 1.150 | 11.5 | 65.0  |      |      |
| Brand 31          |      | 30 | 0.670 | 10.9 | 40.0 | 222 | 0.923 | 9.0  | 50.0 | 178 | 2.000 | 24.0 | 70.0 |     |       |       |      |      |       |       |      |      |       |       |       |      |       |       | 74    | 0.800 | 13.9  | 40.0  |       |       |       |       |       |      |       |      |      |
| Brand 15, Model a |      |    |       |      |      | 270 | 0.923 | 10.5 | 50.0 | 145 | 1.400 | 13.5 | 70.0 |     |       |       |      |      |       |       |      |      |       |       |       |      |       |       | 95    | 0.800 | 13.5  | 40.0  |       |       |       |       |       |      |       |      |      |
| Brand 15, Model b |      | 29 | 0.750 | 10.0 | 45.0 |     |       |      |      |     |       |      |      |     |       |       |      |      |       |       |      |      |       |       |       |      |       |       |       |       |       |       |       |       |       |       |       |      |       |      |      |
| Brand 15, Model c |      |    |       |      |      | 295 | 0.849 | 9.5  | 50.0 | 160 | 1.500 | 14.0 | 70.0 |     |       |       |      |      |       |       |      |      |       |       |       |      |       |       | 98    | 0.850 | 14.0  | 40.0  |       |       |       |       |       |      |       |      |      |
| Brand 15          | avg. | 29 | 0.750 | 10.0 | 45.0 | 283 | 0.886 | 10.0 | 50.0 | 153 | 1.450 | 13.8 | 70.0 |     |       |       |      |      |       |       |      |      |       |       |       |      |       |       | 97    | 0.825 | 13.8  | 40.0  |       |       |       |       |       |      |       |      |      |
| Brand 15          | MIN. | 29 | 0.750 | 10.0 | 45.0 | 270 | 0.849 | 9.5  | 50.0 | 145 | 1.400 | 13.5 | 70.0 |     |       |       |      |      |       |       |      |      |       |       |       |      |       |       | 95    | 0.800 | 13.5  | 40.0  |       |       |       |       |       |      |       |      |      |
| Brand 15          | MAX. | 29 | 0.750 | 10.0 | 45.0 | 295 | 0.923 | 10.5 | 50.0 | 160 | 1.500 | 14.0 | 70.0 |     |       |       |      |      |       |       |      |      |       |       |       |      |       |       | 98    | 0.850 | 14.0  | 40.0  |       |       |       |       |       |      |       |      |      |
| Brand 17, Model a |      | 30 | 0.750 | 11.0 | 45.0 | 190 | 0.910 | 11.0 | 50.0 | 170 | 1.600 | 18.5 | 60.0 | 180 | 1.300 | 15.0  | 55.0 |      |       |       |      |      |       |       |       |      |       |       | 130   | 0.900 | 14.5  | 40.0  | 90    | 1.350 | 12.5  | 65.0  |       |      |       |      |      |
| Brand 17, Model b |      | 30 | 0.700 | 10.0 | 45.0 | 205 | 0.690 | 9.0  | 45.0 | 165 | 1.400 | 16.5 | 60.0 | 175 | 1.100 | 13.0  | 55.0 |      |       |       |      |      |       |       |       |      |       |       | 125   | 0.750 | 13.5  | 40.0  | 90    | 1.150 | 11.5  | 65.0  |       |      |       |      |      |
| Brand 17          | avg. | 30 | 0.725 | 10.5 | 45.0 | 198 | 0.800 | 10.0 | 47.5 | 168 | 1.500 | 17.5 | 60.0 | 178 | 1.200 | 14.0  | 55.0 |      |       |       |      |      |       |       |       |      |       |       | 128   | 0.825 | 14.0  | 40.0  | 90    | 1.250 | 12.0  | 65.0  |       |      |       |      |      |
| Brand 17          | MIN. | 30 | 0.700 | 10.0 | 45.0 | 190 | 0.690 | 9.0  | 45.0 | 165 | 1.400 | 16.5 | 60.0 | 175 | 1.100 | 13.0  | 55.0 |      |       |       |      |      |       |       |       |      |       |       | 125   | 0.750 | 13.5  | 40.0  | 90    | 1.150 | 11.5  | 65.0  |       |      |       |      |      |
| Brand 17          | MAX. | 30 | 0.750 | 11.0 | 45.0 | 205 | 0.910 | 11.0 | 50.0 | 170 | 1.600 | 18.5 | 60.0 | 180 | 1.300 | 15.0  | 55.0 |      |       |       |      |      |       |       |       |      |       |       | 130   | 0.900 | 14.5  | 40.0  | 90    | 1.350 | 12.5  | 65.0  |       |      |       |      |      |
| Brand 18, Model a |      |    |       |      |      | 195 | 1.057 | 12.0 | 45.0 | 170 | 1.600 | 18.5 | 60.0 |     |       |       |      |      |       |       |      |      |       |       |       |      |       |       | 130   | 0.950 | 14.5  | 40.0  |       |       |       |       |       |      |       |      |      |
| Brand 18, Model b |      | 30 | 0.750 | 11.0 | 45.0 | 225 | 0.950 | 10.5 | 50.0 | 175 | 1.600 | 17.5 | 60.0 |     |       |       |      |      |       |       |      |      |       |       |       |      |       |       | 130   | 0.900 | 13.0  | 40.0  |       |       |       |       |       |      |       |      |      |
| Brand 18, Model c |      |    |       |      |      | 210 | 0.848 | 9.9  | 50.0 | 205 | 1.500 | 16.6 | 65.0 |     |       |       |      | 150  | 0.850 | 8.5   | 55.0 | 150  | 1.550 | 18.0  | 65.0  | 150  | 1.200 | 13.3  | 60.0  | 120   | 0.950 | 13.5  | 50.0  | 60    | 0.950 | 15.0  | 60.0  |      |       |      |      |
| Brand 18, Model d |      |    |       |      |      | 225 | 0.950 | 10.5 | 50.0 | 175 | 1.600 | 17.5 | 60.0 |     |       |       |      | 150  | 0.900 | 11.0  | 45.0 | 150  | 1.300 | 15.0  | 55.0  |      | 150   | 1.100 | 13.0  | 50.0  | 130   | 0.900 | 13.0  | 40.0  | 60    | 1.150 | 10.0  | 60.0 |       |      |      |
| Brand 18, Model e |      | 30 | 0.750 | 11.0 | 45.0 | 225 | 0.936 | 10.5 | 50.0 | 175 | 1.600 | 17.5 | 60.0 |     |       |       |      | 150  | 0.900 | 11.0  | 45.0 | 150  | 1.300 | 15.0  | 55.0  |      | 150   | 1.100 | 13.0  | 50.0  | 130   | 0.900 | 13.0  | 40.0  | 60    | 1.150 | 10.0  | 60.0 |       |      |      |

|                   |      |    |       |      |      |       |       |      |      |       |       |      |      |       |       |      |      |       |       |       |      |       |       |       |       |       |       |       |       |       |       |       |      |      |       |       |       |      |       |      |      |  |
|-------------------|------|----|-------|------|------|-------|-------|------|------|-------|-------|------|------|-------|-------|------|------|-------|-------|-------|------|-------|-------|-------|-------|-------|-------|-------|-------|-------|-------|-------|------|------|-------|-------|-------|------|-------|------|------|--|
| Brand 18, Model f |      |    |       |      | 195  | 1.037 | 12.0  | 50.0 | 170  | 1.500 | 18.5  | 60.0 | 180  | 1.350 | 15.0  | 55.0 |      |       |       |       |      |       |       |       | 130   | 0.950 | 14.5  | 40.0  | 60    | 0.900 | 10.0  | 60.0  |      |      |       |       |       |      |       |      |      |  |
| Brand 18, Model g |      | 20 | 0.300 | 10.5 | 35.0 | 220   | 0.780 | 9.5  | 45.0 | 165   | 1.300 | 16.5 | 60.0 | 175   | 1.100 | 13.1 | 55.0 |       |       |       |      |       |       |       | 125   | 0.780 | 13.4  | 50.0  | 60    | 0.750 | 9.1   | 60.0  |      |      |       |       |       |      |       |      |      |  |
| Brand 18, Model h |      | 20 | 0.300 | 10.5 | 35.0 | 220   | 0.836 | 9.9  | 45.0 | 165   | 1.300 | 16.5 | 60.0 | 175   | 1.100 | 13.1 | 55.0 |       |       |       |      |       |       |       | 125   | 0.780 | 13.4  | 50.0  | 60    | 0.750 | 9.1   | 60.0  |      |      |       |       |       |      |       |      |      |  |
| Brand 18, Model i |      | 20 | 0.280 | 10.5 | 35.0 | 220   | 0.755 | 9.5  | 50.0 | 175   | 1.330 | 15.5 | 60.0 |       |       |      | 150  | 0.850 | 9.5   | 45.0  | 150  | 1.200 | 13.0  | 55.0  |       | 150   | 1.025 | 11.3  | 50.0  | 125   | 0.710 | 12.0  | 40.0 | 60   | 0.770 | 9.1   | 45.0  |      |       |      |      |  |
| Brand 18, Model j |      | 20 | 0.280 | 10.5 | 35.0 | 220   | 0.704 | 9.9  | 50.0 | 175   | 1.330 | 15.5 | 60.0 |       |       |      | 150  | 0.850 | 9.5   | 45.0  | 150  | 1.200 | 13.0  | 55.0  |       | 150   | 1.025 | 11.3  | 50.0  | 125   | 0.710 | 12.0  | 40.0 | 60   | 0.770 | 9.1   | 45.0  |      |       |      |      |  |
| Brand 18, Model k |      | 38 | 0.781 | 11.0 | 40.0 | 210   | 0.848 | 10.0 | 50.0 | 205   | 1.651 | 16.5 | 65.0 |       |       |      |      |       |       |       |      |       |       |       | 120   | 0.902 | 13.5  | 50.0  |       |       |       |       |      |      |       |       |       |      |       |      |      |  |
| Brand 18          | avg. | 25 | 0.492 | 10.7 | 38.6 | 215   | 0.882 | 10.4 | 48.6 | 178   | 1.483 | 17.0 | 60.9 | 177   | 1.183 | 13.7 | 55.0 | 150   | 0.875 | 10.3  | 45.0 | 150   | 1.170 | 12.9  | 55.0  | 150   | 1.550 | 18.0  | 65.0  | 150   | 1.090 | 12.4  | 52.0 | 126  | 0.857 | 13.3  | 43.6  | 60   | 0.899 | 10.2 | 56.3 |  |
| Brand 18          | MIN. | 20 | 0.280 | 10.5 | 35.0 | 195   | 0.704 | 9.5  | 45.0 | 165   | 1.300 | 15.5 | 60.0 | 175   | 1.100 | 13.1 | 55.0 | 150   | 0.850 | 9.5   | 45.0 | 150   | 0.850 | 8.5   | 55.0  | 150   | 1.550 | 18.0  | 65.0  | 150   | 1.025 | 11.3  | 50.0 | 120  | 0.710 | 12.0  | 40.0  | 60   | 0.750 | 9.1  | 45.0 |  |
| Brand 18          | MAX. | 38 | 0.781 | 11.0 | 45.0 | 225   | 1.057 | 12.0 | 50.0 | 205   | 1.651 | 18.5 | 65.0 | 180   | 1.350 | 15.0 | 55.0 | 150   | 0.900 | 11.0  | 45.0 | 150   | 1.300 | 15.0  | 55.0  | 150   | 1.550 | 18.0  | 65.0  | 150   | 1.200 | 13.3  | 60.0 | 130  | 0.950 | 14.5  | 50.0  | 60   | 1.150 | 15.0 | 60.0 |  |
| Brand 19, Model a |      | 30 | 0.800 | 8.0  | 65.0 | 222   | 0.755 | 11.0 |      | 135   | 1.550 | 17.6 | 65.0 |       |       |      |      |       |       |       |      |       |       |       |       |       |       |       |       |       |       |       |      |      |       |       |       |      |       |      |      |  |
| Brand 19, Model b |      | 30 | 0.740 | 12.4 | 40.0 | 221   | 0.965 | 9.0  | 50.0 | 117   | 1.700 | 17.2 | 65.0 |       |       |      |      |       |       |       |      |       |       |       |       |       |       |       |       |       |       |       |      |      |       |       |       |      |       |      |      |  |
| Brand 19          | avg. | 30 | 0.770 | 10.2 | 52.5 | 222   | 0.860 | 10.0 | 50.0 | 126   | 1.625 | 17.4 | 65.0 |       |       |      |      |       |       |       |      |       |       |       |       |       |       |       |       |       |       |       |      |      |       |       |       |      |       |      |      |  |
| Brand 19          | MIN. | 30 | 0.740 | 8.0  | 40.0 | 221   | 0.755 | 9.0  | 50.0 | 117   | 1.550 | 17.2 | 65.0 |       |       |      |      |       |       |       |      |       |       |       |       |       |       |       |       |       |       |       |      |      |       |       |       |      |       |      |      |  |
| Brand 19          | MAX. | 30 | 0.800 | 12.4 | 65.0 | 222   | 0.965 | 11.0 | 50.0 | 135   | 1.700 | 17.6 | 65.0 |       |       |      |      |       |       |       |      |       |       |       |       |       |       |       |       |       |       |       |      |      |       |       |       |      |       |      |      |  |
| Brand 20, Model a |      |    |       |      |      |       |       |      |      |       |       |      |      |       |       |      |      |       |       |       |      |       |       |       |       |       |       |       |       |       |       |       |      |      |       |       |       |      |       |      |      |  |
| Brand 20, Model b |      | 29 | 0.600 | 12.0 | 35.0 | 140   | 0.950 | 12.0 | 50.0 | 105   | 1.500 | 20.0 | 70.0 | 102   | 1.300 | 20.0 | 65.0 |       |       |       |      |       |       |       |       |       |       |       |       |       |       |       |      |      |       |       |       |      |       |      |      |  |
| Brand 20, Model c |      | 30 | 0.700 | 10.0 | 35.0 |       |       |      |      | 105   | 1.450 | 14.0 | 65.0 | 105   | 0.620 | 13.6 | 45.0 |       | 95    | 1.150 | 10.0 | 55.0  | 150   | 1.550 | 18.0  | 65.0  | 123   | 1.350 | 14.0  | 60.0  |       |       |      |      |       |       |       |      |       |      |      |  |
| Brand 20, Model d |      |    |       |      |      |       |       |      |      | 135   | 1.750 | 21.0 | 75.0 |       |       |      |      |       |       |       |      |       |       |       |       |       |       |       |       |       |       |       |      |      |       |       |       |      |       |      |      |  |
| Brand 20, Model e |      | 30 | 0.500 | 10.0 | 35.0 | 155   | 0.800 | 13.0 | 50.0 | 103   | 1.400 | 20.0 | 70.0 | 140   | 1.350 | 18.0 | 65.0 |       |       |       |      |       |       |       |       |       | 71    | 0.700 | 14.0  | 40.0  |       |       |      |      |       |       |       |      |       |      |      |  |
| Brand 20, Model f |      | 29 | 0.800 | 10.5 | 45.0 | 295   | 0.849 | 9.5  | 50.0 | 130   | 1.350 | 12.8 | 70.0 |       |       |      | 100  | 0.900 | 7.0   | 45.0  |      |       |       | 165   | 1.500 | 15.5  | 65.0  | 133   | 1.200 | 11.3  | 55.0  |       |      |      |       | 60    | 1.300 | 10.5 | 65.0  |      |      |  |
| Brand 20, Model g |      | 30 | 0.500 | 10.0 | 35.0 | 155   | 0.800 | 13.0 | 50.0 | 103   | 1.400 | 20.0 | 70.0 | 140   | 1.350 | 18.0 | 65.0 |       |       |       |      |       |       |       |       |       | 71    | 0.700 | 14.0  | 40.0  |       |       |      |      |       |       |       |      |       |      |      |  |
| Brand 20, Model h |      | 29 | 0.800 | 10.0 |      | 195   | 0.830 | 9.5  |      |       |       |      |      |       |       |      |      |       |       |       |      |       |       |       |       |       | 100   | 0.900 | 14.0  |       |       |       |      |      |       |       |       |      |       |      |      |  |
| Brand 20          | avg. | 30 | 0.650 | 10.4 | 37.0 | 188   | 0.846 | 11.4 | 50.0 | 114   | 1.475 | 18.0 | 70.0 | 122   | 1.155 | 17.4 | 60.0 | 100   | 0.900 | 7.0   | 45.0 | 95    | 1.150 | 10.0  | 55.0  | 158   | 1.525 | 16.8  | 65.0  | 128   | 1.275 | 12.6  | 57.5 | 81   | 0.767 | 14.0  | 40.0  |      |       |      |      |  |
| Brand 21          | MIN. | 29 | 0.500 | 10.0 | 35.0 | 140   | 0.800 | 9.5  | 50.0 | 103   | 1.350 | 12.8 | 65.0 | 102   | 0.620 | 13.6 | 45.0 | 100   | 0.900 | 7.0   | 45.0 | 95    | 1.150 | 10.0  | 55.0  | 150   | 1.500 | 15.5  | 65.0  | 123   | 1.200 | 11.3  | 55.0 | 71   | 0.700 | 14.0  | 40.0  |      |       |      |      |  |
| Brand 22          | MAX. | 30 | 0.800 | 12.0 | 45.0 | 295   | 0.950 | 13.0 | 50.0 | 135   | 1.750 | 21.0 | 75.0 | 140   | 1.350 | 20.0 | 65.0 | 100   | 0.900 | 7.0   | 45.0 | 95    | 1.150 | 10.0  | 55.0  | 165   | 1.550 | 18.0  | 65.0  | 133   | 1.350 | 14.0  | 60.0 | 100  | 0.900 | 14.0  | 40.0  |      |       |      |      |  |
| Brand 21, Model a |      | 27 | 0.700 | 6.5  | 38.0 | 265   | 0.640 | 9.0  | 50.0 | 155   | 1.600 | 15.5 | 70.0 | 150   | 1.350 | 12.5 | 65.0 |       | 45.0  |       |      |       | 65.0  |       |       |       |       |       |       | 125   | 1.150 | 12.5  | 45.0 | 60   | 1.400 | 9.5   | 65.0  |      |       |      |      |  |
| Brand 21, Model b |      | 27 | 0.700 | 6.5  | 38.0 | 150   | 0.910 | 12.0 | 50.0 | 130   | 1.600 | 15.5 | 70.0 |       |       |      |      |       |       |       |      |       |       |       |       |       |       |       |       |       |       |       |      |      |       |       |       |      |       |      |      |  |
| Brand 21, Model c |      | 27 | 0.700 | 6.5  | 38.0 | 264   | 0.630 | 9.0  | 50.0 | 155   | 1.600 | 15.5 | 70.0 |       |       |      |      |       |       |       |      |       |       |       |       |       |       |       |       |       | 125   | 1.150 | 12.5 | 45.0 |       |       |       |      |       |      |      |  |
| Brand 21, Model d |      | 27 | 0.700 | 8.2  | 38.0 | 215   | 0.835 | 12.0 | 50.0 | 130   | 1.600 | 15.5 | 70.0 | 95    | 1.350 | 13.5 | 65.0 |       |       |       |      |       |       |       |       |       |       |       |       |       |       |       |      |      |       |       |       |      |       |      |      |  |
| Brand 21, Model e |      | 27 | 0.700 | 6.7  | 38.0 | 265   | 0.734 | 9.0  | 50.0 | 135   | 1.600 | 15.5 | 70.0 | 150   | 1.350 | 12.5 | 65.0 |       |       |       |      |       |       |       |       |       |       |       |       | 125   | 1.150 | 12.4  | 45.0 | 60   | 1.400 | 9.6   | 65.0  |      |       |      |      |  |
| Brand 21, Model f |      |    |       |      |      |       |       |      |      |       |       |      |      |       |       |      |      |       |       |       |      |       |       |       |       |       |       |       |       |       |       |       |      |      |       |       |       |      |       |      |      |  |
| Brand 21          | avg. | 27 | 0.700 | 6.9  | 38.0 | 232   | 0.750 | 10.2 | 50.0 | 141   | 1.600 | 15.5 | 70.0 | 132   | 1.350 | 12.8 | 65.0 |       |       |       |      |       |       |       |       |       |       |       |       |       | 125   | 1.150 | 12.5 | 45.0 | 60    | 1.400 | 9.6   | 65.0 |       |      |      |  |
| Brand 21          | MIN. | 27 | 0.700 | 6.5  | 38.0 | 150   | 0.630 | 9.0  | 50.0 | 130   | 1.600 | 15.5 | 70.0 | 95    | 1.350 | 12.5 | 65.0 |       |       |       |      |       |       |       |       |       |       |       |       |       | 125   | 1.150 | 12.4 | 45.0 | 60    | 1.400 | 9.5   | 65.0 |       |      |      |  |
| Brand 21          | MAX. | 27 | 0.700 | 8.2  | 38.0 | 265   | 0.910 | 12.0 | 50.0 | 155   | 1.600 | 15.5 | 70.0 | 150   | 1.350 | 13.5 | 65.0 |       |       |       |      |       |       |       |       |       |       |       |       |       | 125   | 1.150 | 12.5 | 45.0 | 60    | 1.400 | 9.6   | 65.0 |       |      |      |  |

|                   |      |    |       |      |      |     |       |      |      |     |       |      |      |     |       |      |      |     |       |     |       |      |       |      |       |       |       |      |       |       |       |      |       |       |       |       |      |       |      |      |
|-------------------|------|----|-------|------|------|-----|-------|------|------|-----|-------|------|------|-----|-------|------|------|-----|-------|-----|-------|------|-------|------|-------|-------|-------|------|-------|-------|-------|------|-------|-------|-------|-------|------|-------|------|------|
| Brand 22, Model a |      | 30 | 0.820 | 11.2 | 45.0 | 198 | 0.747 | 9.8  | 50.0 | 205 | 1.500 | 16.6 | 65.0 | 175 | 0.980 | 13.6 | 55.0 |     |       | 90  | 0.850 | 8.5  | 55.0  | 180  | 1.550 | 18.0  | 65.0  | 135  | 1.200 | 13.3  | 60.0  | 120  | 0.950 | 13.5  | 50.0  |       |      |       |      |      |
| Brand 22, Model b |      | 30 | 0.700 | 10.0 | 45.0 | 190 | 0.740 | 9.0  | 45.0 | 165 | 1.400 | 16.5 | 60.0 | 175 | 1.100 | 13.0 | 55.0 |     |       |     |       |      |       |      |       |       |       |      |       |       |       |      | 125   | 0.750 | 13.5  | 40.0  | 90   | 1.150 | 11.5 | 65.0 |
| Brand 22, Model c |      | 30 | 0.820 | 11.2 | 45.0 | 198 | 0.747 | 9.8  | 50.0 | 205 | 1.500 | 16.6 | 65.0 | 175 | 0.980 | 13.6 | 55.0 |     |       | 90  | 0.850 | 8.5  | 55.0  | 180  | 1.550 | 18.0  | 65.0  | 135  | 1.200 | 13.3  | 60.0  | 120  | 0.950 | 13.5  | 50.0  |       |      |       |      |      |
| Brand 22, Model d |      | 30 | 0.700 | 10.0 | 45.0 | 198 | 0.740 | 8.0  | 45.0 | 170 | 1.400 | 15.5 | 60.0 | 180 | 1.100 | 12.0 | 55.0 | 150 | 0.900 | 9.5 | 45.0  | 150  | 1.300 | 13.0 | 55.0  |       |       | 150  | 1.100 | 11.3  | 50.0  | 125  | 0.750 | 12.0  | 40.0  |       |      |       |      |      |
| Brand 22          | avg. | 30 | 0.760 | 10.6 | 45.0 | 196 | 0.744 | 9.2  | 47.5 | 186 | 1.450 | 16.3 | 62.5 | 176 | 1.040 | 13.1 | 55.0 | 150 | 0.900 | 9.5 | 45.0  | 110  | 1.000 | 10.0 | 55.0  | 180   | 1.550 | 18.0 | 65.0  | 140   | 1.167 | 12.6 | 56.7  | 123   | 0.850 | 13.1  | 45.0 |       |      |      |
| Brand 22          | MIN. | 30 | 0.700 | 10.0 | 45.0 | 190 | 0.740 | 8.0  | 45.0 | 165 | 1.400 | 15.5 | 60.0 | 175 | 0.980 | 12.0 | 55.0 | 150 | 0.900 | 9.5 | 45.0  | 90   | 0.850 | 8.5  | 55.0  | 180   | 1.550 | 18.0 | 65.0  | 135   | 1.100 | 11.3 | 50.0  | 120   | 0.750 | 12.0  | 40.0 |       |      |      |
| Brand 22          | MAX. | 30 | 0.820 | 11.2 | 45.0 | 198 | 0.747 | 9.8  | 50.0 | 205 | 1.500 | 16.6 | 65.0 | 180 | 1.100 | 13.6 | 55.0 | 150 | 0.900 | 9.5 | 45.0  | 150  | 1.300 | 13.0 | 55.0  | 180   | 1.550 | 18.0 | 65.0  | 150   | 1.200 | 13.3 | 60.0  | 125   | 0.950 | 13.5  | 50.0 |       |      |      |
| Brand 16, Model a |      | 30 | 0.800 | 10.0 | 45.0 | 140 | 1.050 | 12.0 | 50.0 | 138 | 1.650 | 16.0 | 70.0 |     |       |      |      |     |       | 85  | 1.100 | 10.0 | 55.0  | 140  | 1.600 | 17.0  | 65.0  | 113  | 1.350 | 13.5  | 60.0  | 75   | 0.900 | 14.0  | 40.0  |       |      |       |      |      |
| Brand 16, Model b |      | 35 | 0.950 | 13.0 | 45.0 | 140 | 1.050 | 16.0 | 50.0 | 130 | 1.800 | 19.0 | 70.0 | 125 | 1.750 | 19.0 | 65.0 |     |       |     |       |      |       |      |       |       |       |      |       |       |       |      | 75    | 1.000 | 17.0  | 40.0  |      |       |      |      |
| Brand 16          | avg. | 33 | 0.875 | 11.5 | 45.0 | 140 | 1.050 | 14.0 | 50.0 | 134 | 1.725 | 17.5 | 70.0 | 125 | 1.750 | 19.0 | 65.0 |     |       | 85  | 1.100 | 10.0 | 55.0  | 140  | 1.600 | 17.0  | 65.0  | 113  | 1.350 | 13.5  | 60.0  | 75   | 0.950 | 15.5  | 40.0  |       |      |       |      |      |
| Brand 16          | MIN. | 30 | 0.800 | 10.0 | 45.0 | 140 | 1.050 | 12.0 | 50.0 | 130 | 1.650 | 16.0 | 70.0 | 125 | 1.750 | 19.0 | 65.0 |     |       | 85  | 1.100 | 10.0 | 55.0  | 140  | 1.600 | 17.0  | 65.0  | 113  | 1.350 | 13.5  | 60.0  | 75   | 0.900 | 14.0  | 40.0  |       |      |       |      |      |
| Brand 16          | MAX. | 35 | 0.950 | 13.0 | 45.0 | 140 | 1.050 | 16.0 | 50.0 | 138 | 1.800 | 19.0 | 70.0 | 125 | 1.750 | 19.0 | 65.0 |     |       | 85  | 1.100 | 10.0 | 55.0  | 140  | 1.600 | 17.0  | 65.0  | 113  | 1.350 | 13.5  | 60.0  | 75   | 1.000 | 17.0  | 40.0  |       |      |       |      |      |
| Brand 23, Model a |      | 30 | 0.900 | 12.4 | 40.0 | 165 | 0.900 | 12.0 | 50.0 | 117 | 1.610 | 17.2 | 65.0 |     |       |      |      |     |       |     |       |      |       |      |       |       |       |      |       |       |       |      |       |       | 50    | 1.350 | 12.7 | 65.0  |      |      |
| Brand 23, Model b |      | 30 | 0.760 | 10.9 | 40.0 | 156 | 0.900 | 9.0  | 50.0 | 117 | 1.950 | 24.6 | 70.0 |     |       |      |      |     |       | 100 | 1.130 | 10.9 | 50.0  | 121  | 1.460 | 18.5  | 60.0  | 111  | 1.295 | 14.7  | 55.0  |      |       |       |       |       |      |       |      |      |
| Brand 23          | avg. | 30 | 0.830 | 11.7 | 40.0 | 161 | 0.900 | 10.5 | 50.0 | 117 | 1.780 | 20.9 | 67.5 |     |       |      |      |     |       | 100 | 1.130 | 10.9 | 50.0  | 121  | 1.460 | 18.5  | 60.0  | 111  | 1.295 | 14.7  | 55.0  |      |       |       |       |       |      |       |      |      |
| Brand 23          | MIN. | 30 | 0.760 | 10.9 | 40.0 | 156 | 0.900 | 9.0  | 50.0 | 117 | 1.610 | 17.2 | 65.0 |     |       |      |      |     |       | 100 | 1.130 | 10.9 | 50.0  | 121  | 1.460 | 18.5  | 60.0  | 111  | 1.295 | 14.7  | 55.0  |      |       |       |       |       |      |       |      |      |
| Brand 23          | MAX. | 30 | 0.900 | 12.4 | 40.0 | 165 | 0.900 | 12.0 | 50.0 | 117 | 1.950 | 24.6 | 70.0 |     |       |      |      |     |       | 100 | 1.130 | 10.9 | 50.0  | 121  | 1.460 | 18.5  | 60.0  | 111  | 1.295 | 14.7  | 55.0  |      |       |       |       |       |      |       |      |      |
| Brand 24, Model a |      | 50 | 0.850 | 11.0 | 45.0 | 230 | 0.920 | 10.0 | 50.0 | 175 | 1.450 | 13.0 | 70.0 |     |       |      |      |     |       |     |       |      |       |      |       |       |       |      |       |       |       |      | 114   | 0.850 | 10.5  | 40.0  |      |       |      |      |
| Brand 24, Model b |      | 30 | 0.800 | 11.0 | 45.0 | 170 | 1.050 | 11.0 | 50.0 |     |       |      |      |     |       |      |      | 65  | 0.990 | 7.0 | 40.0  |      |       |      | 205   | 1.750 | 15.0  | 70.0 | 135   | 1.370 | 11.0  | 55.0 | 100   | 0.850 | 10.0  | 40.0  |      |       |      |      |
| Brand 24, Model c |      | 30 | 0.550 | 9.0  | 50.0 | 190 | 0.950 | 9.5  | 50.0 | 170 | 1.500 | 14.0 | 65.0 | 95  | 1.150 | 13.0 | 50.0 | 85  | 0.900 | 7.0 | 50.0  |      |       |      | 180   | 1.400 | 14.0  | 60.0 | 133   | 1.150 | 10.5  | 55.0 | 100   | 1.200 | 11.5  | 45.0  |      |       |      |      |
| Brand 24, Model d |      | 30 | 0.500 | 9.0  | 50.0 | 190 | 0.750 | 9.5  | 50.0 | 170 | 1.500 | 14.0 | 65.0 | 85  | 1.100 | 11.5 | 50.0 | 85  | 0.900 | 7.0 | 50.0  |      |       |      | 180   | 1.400 | 14.0  | 60.0 | 133   | 1.150 | 10.5  | 55.0 | 100   | 1.200 | 11.5  | 45.0  |      |       |      |      |
| Brand 24, Model e |      | 30 | 0.550 | 9.0  | 50.0 | 190 | 0.930 | 9.5  | 50.0 | 170 | 1.500 | 14.0 | 65.0 | 95  | 1.150 | 13.0 | 50.0 | 85  | 0.900 | 7.0 | 50.0  |      |       |      | 180   | 1.400 | 14.0  | 60.0 | 133   | 1.150 | 10.5  | 55.0 | 100   | 1.200 | 11.5  | 45.0  |      |       |      |      |
| Brand 24          | avg. | 34 | 0.650 | 9.8  | 48.0 | 194 | 0.920 | 9.9  | 50.0 | 171 | 1.488 | 13.8 | 66.3 | 92  | 1.133 | 12.5 | 50.0 | 80  | 0.923 | 7.0 | 47.5  |      |       |      | 186   | 1.488 | 14.3  | 62.5 | 133   | 1.205 | 10.6  | 55.0 | 103   | 1.060 | 11.0  | 43.0  |      |       |      |      |
| Brand 24          | MIN. | 30 | 0.500 | 9.0  | 45.0 | 170 | 0.750 | 9.5  | 50.0 | 170 | 1.450 | 13.0 | 65.0 | 85  | 1.100 | 11.5 | 50.0 | 65  | 0.900 | 7.0 | 40.0  |      |       |      | 180   | 1.400 | 14.0  | 60.0 | 133   | 1.150 | 10.5  | 55.0 | 100   | 0.850 | 10.0  | 40.0  |      |       |      |      |
| Brand 24          | MAX. | 50 | 0.850 | 11.0 | 50.0 | 230 | 1.050 | 11.0 | 50.0 | 175 | 1.500 | 14.0 | 70.0 | 95  | 1.150 | 13.0 | 50.0 | 85  | 0.990 | 7.0 | 50.0  |      |       |      | 205   | 1.750 | 15.0  | 70.0 | 135   | 1.370 | 11.0  | 55.0 | 114   | 1.200 | 11.5  | 45.0  |      |       |      |      |
| Brand 25, Model a |      | 30 | 0.900 | 9.0  | 65.0 | 130 | 1.000 | 14.0 | 50.0 | 85  | 1.800 | 22.0 | 70.0 | 105 | 1.500 | 23.0 | 65.0 |     |       |     |       |      |       |      |       |       |       |      |       |       |       |      |       |       |       |       |      |       |      |      |
| Brand 25, Model b |      | 30 | 0.900 | 9.0  | 65.0 | 140 | 1.200 | 16.0 | 50.0 | 95  | 2.000 | 25.0 | 70.0 | 115 | 1.700 | 25.0 | 65.0 |     |       |     |       |      |       |      |       |       |       |      |       |       |       |      |       |       |       |       |      |       |      |      |
| Brand 25, Model c |      | 30 | 1.050 | 11.0 | 65.0 |     |       |      |      | 110 | 1.150 | 16.0 | 65.0 | 95  | 1.150 | 13.0 | 65.0 |     |       |     |       |      |       |      |       |       |       |      |       |       |       |      |       |       |       |       |      |       |      |      |
| Brand 25, Model d |      | 40 | 1.150 | 13.0 | 65.0 |     |       |      |      | 120 | 1.240 | 18.0 | 65.0 | 105 | 1.240 | 15.0 | 65.0 |     |       |     |       |      |       |      |       |       |       |      |       |       |       |      |       |       |       |       |      |       |      |      |
| Brand 25, Model e |      | 30 | 1.050 | 11.0 | 65.0 | 115 | 0.950 | 16.0 | 50.0 | 125 | 1.400 | 18.0 | 65.0 | 110 | 1.400 | 14.0 | 65.0 |     |       |     |       |      |       |      |       |       |       |      |       |       |       |      |       |       |       |       |      |       |      |      |
| Brand 25, Model f |      | 40 | 1.150 | 13.0 | 65.0 | 125 | 1.050 | 18.0 | 50.0 | 135 | 1.500 | 20.0 | 65.0 | 120 | 1.500 | 16.0 | 65.0 |     |       |     |       |      |       |      |       |       |       |      |       |       |       |      |       |       |       |       |      |       |      |      |
| Brand 25, Model g |      | 40 | 1.000 | 17.0 | 50.0 | 70  | 1.400 | 20.0 | 50.0 | 70  | 1.500 | 20.0 | 65.0 | 64  | 1.500 | 17.0 | 65.0 |     |       |     |       |      |       |      |       |       |       |      |       |       |       |      |       |       |       |       |      |       |      |      |
| Brand 25, Model h |      | 30 | 0.800 | 9.0  | 65.0 | 195 | 1.020 | 11.0 | 50.0 | 130 | 1.400 | 13.0 | 70.0 | 100 | 1.200 | 15.0 | 65.0 |     |       |     |       |      |       |      |       |       |       |      |       |       |       |      |       |       |       |       |      |       |      |      |
| Brand 25, Model i |      | 30 | 0.800 | 9.0  | 65.0 | 195 | 1.020 | 11.0 | 50.0 | 150 | 1.400 | 15.0 | 70.0 | 110 | 1.600 | 16.0 | 65.0 |     |       |     |       |      |       |      |       |       |       |      |       |       |       |      |       |       |       |       |      |       |      |      |
| Brand 25, Model j |      | 40 | 1.000 | 17.0 | 55.0 | 70  | 1.400 | 20.0 | 50.0 | 80  | 1.900 | 25.0 | 70.0 | 70  | 1.500 | 20.0 | 65.0 |     |       |     |       |      |       |      |       |       |       |      |       |       |       |      |       |       |       |       |      |       |      |      |

|          |      |    |       |      |      |     |       |      |      |     |       |      |      |     |       |      |      |  |  |  |  |  |  |  |  |
|----------|------|----|-------|------|------|-----|-------|------|------|-----|-------|------|------|-----|-------|------|------|--|--|--|--|--|--|--|--|
| Brand 25 | avg. | 34 | 0.980 | 11.8 | 62.5 | 130 | 1.130 | 15.8 | 50.0 | 110 | 1.529 | 19.2 | 67.5 | 99  | 1.429 | 17.4 | 65.0 |  |  |  |  |  |  |  |  |
| Brand 25 | MIN. | 30 | 0.800 | 9.0  | 50.0 | 70  | 0.950 | 11.0 | 50.0 | 70  | 1.150 | 13.0 | 65.0 | 64  | 1.150 | 13.0 | 65.0 |  |  |  |  |  |  |  |  |
| Brand 25 | MAX. | 40 | 1.150 | 17.0 | 65.0 | 195 | 1.400 | 20.0 | 50.0 | 150 | 2.000 | 25.0 | 70.0 | 120 | 1.700 | 25.0 | 65.0 |  |  |  |  |  |  |  |  |

Supplementary material S2: Information about average energy and water consumption, temperature and time of all cycles of the machines of different manufacturers.

|        | Short |         |       |        | Eco    |         |       |        | Intensive |         |       |        | Auto/Normal average |         |       |        | Auto/Normal average<br>(higher t&T) |         |       |        | Normal |         |       |        | Auto 45 °C |         |       |        | Auto 55 °C |         |       |        | Auto 65-70 |         |       |        | Auto average |         |       |        | Glass  |         |       |        | 1 Hour |       |       |       |  |  |  |
|--------|-------|---------|-------|--------|--------|---------|-------|--------|-----------|---------|-------|--------|---------------------|---------|-------|--------|-------------------------------------|---------|-------|--------|--------|---------|-------|--------|------------|---------|-------|--------|------------|---------|-------|--------|------------|---------|-------|--------|--------------|---------|-------|--------|--------|---------|-------|--------|--------|-------|-------|-------|--|--|--|
| Device | [min] | E [kWh] | W (L) | T [°C] | [min]  | E [kWh] | W (L) | T [°C] | [min]     | E [kWh] | W (L) | T [°C] | [min]               | E [kWh] | W (L) | T [°C] | [min]                               | E [kWh] | W (L) | T [°C] | [min]  | E [kWh] | W (L) | T [°C] | [min]      | E [kWh] | W (L) | T [°C] | [min]      | E [kWh] | W (L) | T [°C] | [min]      | E [kWh] | W (L) | T [°C] | [min]        | E [kWh] | W (L) | T [°C] | [min]  | E [kWh] | W (L) | T [°C] |        |       |       |       |  |  |  |
| 1      | 30.00 | 0.87    | 10.00 | 61.50  | 227.22 | 0.88    | 10.47 | 50.00  | 159.15    | 1.57    | 14.14 | 70.00  | 97.17               | 1.15    | 12.20 | 60.00  | 125.19                              | 1.37    | 13.81 | 66.25  | 91.50  | 1.20    | 13.95 | 62.50  | 46.78      | 0.67    | 7.22  | 45.00  |            |         |       |        | 158.89     | 1.53    | 13.67 | 70.00  | 102.83       | 1.10    | 10.44 | 57.50  | 84.29  | 0.89    | 13.29 | 45.00  |        |       |       |       |  |  |  |
| 2      | 31.25 | 0.68    | 10.75 | 37.50  | 147.50 | 0.93    | 14.00 | 50.00  | 112.00    | 1.55    | 20.00 | 70.00  | 127.50              | 1.40    | 16.67 | 62.50  | 140.00                              | 1.49    | 18.67 | 65.00  | 135.00 | 1.48    | 18.33 | 65.00  |            |         |       |        | 95.00      | 1.15    | 11.00 | 55.00  | 145.00     | 1.50    | 19.00 | 65.00  | 120.00       | 1.33    | 15.00 | 60.00  | 72.00  | 0.80    | 15.00 | 40.00  |        |       |       |       |  |  |  |
| 3      | 30.00 | 0.80    | 11.11 | 36.88  | 194.56 | 0.89    | 11.06 | 50.00  | 142.57    | 1.49    | 16.96 | 70.00  | 136.17              | 1.22    | 12.52 | 52.50  | 171.67                              | 1.51    | 14.33 | 65.00  |        |         |       |        | 100.67     | 0.93    | 10.70 | 40.71  |            |         |       |        | 171.67     | 1.51    | 14.33 | 65.00  | 136.17       | 1.22    | 12.52 | 52.50  | 103.67 | 1.10    | 13.47 | 40.00  | 58.00  | 1.21  | 11.08 | 61.25 |  |  |  |
| 4      | 30.00 | 0.77    | 10.87 | 35.00  | 190.00 | 1.04    | 10.00 | 50.00  | 140.67    | 1.55    | 17.53 | 70.00  | 131.50              | 1.51    | 16.12 | 62.50  | 148.33                              | 1.63    | 17.57 | 67.50  | 132.00 | 1.77    | 18.60 | 70.00  | 90.00      | 0.90    | 11.00 | 40.00  | 112.00     | 1.18    | 10.20 | 55.00  | 164.67     | 1.49    | 16.53 | 65.00  | 131.00       | 1.24    | 13.63 | 55.00  | 78.00  | 0.88    | 13.40 | 40.00  | 58.00  | 1.25  | 10.80 | 60.00 |  |  |  |
| 5      | 29.89 | 0.78    | 10.49 | 44.00  | 243.50 | 0.83    | 10.07 | 50.26  | 132.88    | 1.37    | 14.14 | 69.74  | 108.88              | 1.21    | 12.46 | 58.75  | 123.98                              | 1.35    | 14.52 | 63.75  | 87.57  | 1.27    | 13.43 | 62.50  | 100.00     | 0.86    | 7.38  | 45.00  |            |         |       |        | 160.38     | 1.42    | 15.62 | 65.00  | 130.19       | 1.14    | 11.50 | 55.00  | 89.00  | 0.86    | 14.87 | 40.00  | 60.00  | 1.24  | 10.36 | 65.00 |  |  |  |
| 6      | 38.00 | 0.66    | 10.80 | 42.00  | 185.00 | 0.91    | 10.40 | 47.00  | 171.00    | 1.58    | 17.80 | 65.00  | 166.25              | 1.19    | 12.94 | 52.50  | 173.75                              | 1.29    | 14.43 | 55.00  | 182.50 | 1.29    | 14.50 | 55.00  | 135.00     | 0.90    | 8.40  | 45.00  | 165.00     | 1.30    | 14.35 | 55.00  |            |         |       | 150.00 | 1.10         | 11.38   | 50.00 | 116.25 | 0.87   | 14.13   | 43.75 | 78.00  | 1.27   | 11.40 | 62.00 |       |  |  |  |
| 7      | 30.00 | 0.78    | 9.50  | 57.50  | 212.50 | 0.90    | 11.45 | 50.00  | 153.75    | 1.63    | 16.63 | 70.00  | 107.75              | 1.43    | 17.25 | 61.25  | 136.50                              | 1.63    | 18.50 | 67.50  | 113.00 | 1.75    | 25.00 | 65.00  | 45.00      | 0.70    | 7.00  | 45.00  |            |         |       |        | 160.00     | 1.50    | 12.00 | 70.00  | 102.50       | 1.10    | 9.50  | 57.50  | 82.33  | 0.97    | 13.67 | 45.00  |        |       |       |       |  |  |  |
| 8      | 30.00 | 0.75    | 11.00 | 45.00  | 212.50 | 0.80    | 10.00 | 45.00  | 187.50    | 1.49    | 16.90 | 62.50  | 177.50              | 1.29    | 14.05 | 55.00  | 177.50                              | 1.29    | 14.05 | 55.00  | 177.50 | 1.29    | 14.05 | 55.00  |            |         |       |        |            |         |       |        |            |         |       |        |              |         |       |        |        |         |       |        |        |       |       |       |  |  |  |
| 9      | 27.67 | 0.67    | 9.33  | 51.67  | 185.00 | 0.94    | 10.33 | 45.00  | 143.33    | 1.85    | 18.83 | 73.33  | 140.00              | 1.39    | 13.67 | 58.33  | 140.00                              | 1.39    | 13.67 | 58.33  | 140.00 | 1.39    | 13.67 | 58.33  |            |         |       |        |            |         |       |        |            |         |       |        |              |         |       |        |        |         |       |        |        |       |       |       |  |  |  |
| 10     | 30.11 | 0.54    | 8.93  | 42.50  | 167.25 | 0.96    | 10.86 | 48.75  | 143.56    | 1.55    | 16.06 | 66.25  | 114.00              | 1.26    | 15.14 | 57.50  | 114.00                              | 1.26    | 15.14 | 57.50  | 114.00 | 1.26    | 15.14 | 57.50  |            |         |       |        |            |         |       |        |            |         |       |        |              |         |       |        |        |         |       |        |        |       |       |       |  |  |  |
| 11     | 33.80 | 0.73    | 10.06 | 54.00  | 220.40 | 0.90    | 11.76 | 50.00  | 159.22    | 1.38    | 13.43 | 67.78  | 104.69              | 1.04    | 11.08 | 59.27  | 131.25                              | 1.24    | 12.47 | 64.58  | 95.00  | 1.04    | 12.07 | 61.67  | 61.25      | 0.64    | 7.33  | 46.25  |            |         |       |        | 167.50     | 1.43    | 12.88 | 67.50  | 114.38       | 1.04    | 10.10 | 56.88  | 92.00  | 0.90    | 14.00 | 45.00  | 60.00  | 0.77  | 10.00 | 60.00 |  |  |  |
| 12     | 32.71 | 0.69    | 9.07  | 47.50  | 184.00 | 0.98    | 10.93 | 50.00  | 151.43    | 1.50    | 14.79 | 65.00  | 130.00              | 1.30    | 15.32 | 54.38  | 130.00                              | 1.30    | 15.32 | 54.38  | 115.00 | 1.25    | 14.64 | 53.75  |            |         |       |        | 145.00     | 1.35    | 16.00 | 55.00  |            |         |       | 145.00 | 1.35         | 16.00   | 55.00 | 96.67  | 1.08   | 11.17   | 42.50 | 60.00  | 1.03   | 11.00 | 50.00 |       |  |  |  |
| 13     | 30.00 | 0.81    | 11.00 | 40.00  | 205.00 | 0.89    | 10.50 | 45.00  | 172.50    | 1.60    | 18.00 | 60.00  | 166.25              | 1.20    | 13.63 | 52.50  | 166.25                              | 1.30    | 14.63 | 55.00  | 182.50 | 1.30    | 14.25 | 55.00  | 150.00     | 0.90    | 11.00 | 45.00  | 150.00     | 1.30    | 15.00 | 55.00  |            |         |       | 150.00 | 1.10         | 13.00   | 50.00 | 130.00 | 0.90   | 13.75   | 40.00 |        |        |       |       |       |  |  |  |
| 14     | 37.67 | 0.70    | 11.92 | 40.83  | 194.44 | 0.90    | 10.56 | 46.56  | 168.11    | 1.46    | 14.78 | 75.00  | 116.20              | 1.11    | 12.64 | 56.19  | 134.00                              | 1.22    | 14.92 | 60.83  | 84.83  | 1.10    | 12.00 | 56.67  | 105.17     | 0.81    | 8.42  | 45.33  | 122.50     | 1.23    | 13.50 | 55.00  | 183.17     | 1.34    | 17.83 | 65.00  | 147.57       | 1.12    | 13.29 | 55.71  | 145.17 | 0.93    | 11.42 | 44.00  | 58.00  | 1.20  | 10.75 | 65.00 |  |  |  |
| 15     | 29.00 | 0.75    | 10.00 | 45.00  | 282.50 | 0.89    | 10.00 | 50.00  | 152.50    | 1.45    | 13.75 | 70.00  |                     |         |       |        |                                     |         |       |        |        |         |       |        |            |         |       |        |            |         |       |        |            |         |       |        |              |         |       |        |        |         |       |        |        |       |       |       |  |  |  |
| 16     | 32.50 | 0.88    | 11.50 | 45.00  | 140.00 | 1.05    | 14.00 | 50.00  | 134.00    | 1.73    | 17.50 | 70.00  | 118.75              | 1.55    | 16.25 | 62.50  | 132.50                              | 1.68    | 18.00 | 65.00  | 125.00 | 1.75    | 19.00 | 65.00  |            |         |       |        | 85.00      | 1.10    | 10.00 | 55.00  | 140.00     | 1.60    | 17.00 | 65.00  | 112.50       | 1.35    | 13.50 | 60.00  | 75.00  | 0.95    | 15.50 | 40.00  |        |       |       |       |  |  |  |
| 17     | 30.00 | 0.73    | 10.50 | 45.00  | 197.50 | 0.80    | 10.00 | 47.50  | 167.50    | 1.50    | 17.50 | 60.00  | 177.50              | 1.20    | 14.00 | 55.00  | 177.50                              | 1.20    | 14.00 | 55.00  | 177.50 | 1.20    | 14.00 | 55.00  |            |         |       |        |            |         |       |        |            |         |       |        |              |         |       |        |        |         |       |        |        |       |       |       |  |  |  |
| 18     | 25.43 | 0.49    | 10.71 | 38.57  | 215.00 | 0.88    | 10.38 | 48.64  | 177.73    | 1.48    | 16.96 | 60.91  | 163.33              | 1.14    | 13.04 | 53.50  | 163.33                              | 1.37    | 15.87 | 60.00  | 176.67 | 1.18    | 13.73 | 55.00  | 150.00     | 0.88    | 10.25 | 45.00  | 150.00     | 1.17    | 12.90 | 55.00  | 150.00     | 1.55    | 18.00 | 65.00  | 150.00       | 1.09    | 12.35 | 52.00  | 126.36 | 0.86    | 13.25 | 43.64  | 60.00  | 0.90  | 10.18 | 56.25 |  |  |  |
| 19     | 30.00 | 0.77    | 10.20 | 52.50  | 221.50 | 0.86    | 10.00 | 50.00  | 126.00    | 1.63    | 17.40 | 65.00  |                     |         |       |        |                                     |         |       |        |        |         |       |        |            |         |       |        |            |         |       |        |            |         |       |        |              |         |       |        |        |         |       |        |        |       |       |       |  |  |  |
| 20     | 29.50 | 0.65    | 10.42 | 37.00  | 188.00 | 0.85    | 11.40 | 50.00  | 113.50    | 1.48    | 17.96 | 70.00  | 124.63              | 1.22    | 15.01 | 58.75  | 139.63                              | 1.34    | 17.08 | 62.50  | 121.75 | 1.16    | 17.40 | 60.00  | 100.00     | 0.90    | 7.00  | 45.00  | 95.00      | 1.15    | 10.00 | 55.00  | 157.50     | 1.53    | 16.75 | 65.00  | 127.50       | 1.28    | 12.63 | 57.50  | 80.67  | 0.77    | 14.00 | 40.00  | 60.00  | 1.30  | 10.50 | 65.00 |  |  |  |
| 21     | 27.00 | 0.70    | 6.88  | 38.00  | 231.80 | 0.75    | 10.20 | 50.00  | 141.00    | 1.60    | 15.50 | 70.00  | 131.67              | 1.35    | 12.83 | 65.00  | 131.67                              | 1.35    | 12.83 | 65.00  | 131.67 | 1.35    | 12.83 | 65.00  |            |         |       | 45.00  |            |         |       |        |            |         |       |        |              |         |       |        |        |         |       |        |        |       |       |       |  |  |  |
| 22     | 30.00 | 0.76    | 10.60 | 45.00  | 196.00 | 0.74    | 9.15  | 47.50  | 186.25    | 1.45    | 16.30 | 62.50  | 158.13              | 1.10    | 12.82 | 55.83  | 178.13                              | 1.30    | 15.53 | 60.00  | 176.25 | 1.04    | 13.05 | 55.00  | 150.00     | 0.90    | 9.50  | 45.00  | 110.00     | 1.00    | 10.00 | 55.00  | 180.00     | 1.55    | 18.00 | 65.00  | 140.00       | 1.17    | 12.58 | 56.67  | 122.50 | 0.85    | 13.13 | 45.00  | 90.00  | 1.15  | 11.50 | 65.00 |  |  |  |
| 23     | 30.00 | 0.83    | 11.65 | 40.00  | 160.50 | 0.90    | 10.50 | 50.00  | 117.00    | 1.78    | 20.90 | 67.50  | 110.50              | 1.30    | 14.70 | 55.00  | 121.00                              | 1.46    | 18.50 | 60.00  |        |         |       |        |            |         |       |        | 100.00     | 1.13    | 10.90 | 50.00  | 121.00     | 1.46    | 18.50 | 60.00  | 110.50       | 1.30    | 14.70 | 55.00  |        |         |       | 50.00  | 1.35   | 12.70 | 65.00 |       |  |  |  |
| 24     | 34.00 | 0.65    | 9.80  | 48.00  | 194.00 | 0.92    | 9.90  | 50.00  | 171.25    | 1.49    | 13.75 | 66.25  | 112.40              | 1.17    | 11.56 | 52.50  | 138.96                              | 1.31    | 13.38 | 56.25  | 91.67  | 1.13    | 12.50 | 50.00  | 80.00      | 0.92    | 7.00  | 47.50  |            |         |       |        | 186.25     | 1.49    | 14.25 | 62.50  | 133.13       | 1.21    | 10.63 | 55.00  | 102.80 | 1.06    | 11.00 | 43.00  |        |       |       |       |  |  |  |





**Supplementary material S4: Anonymized brand distribution in 11 different countries in %.**

| Brand            | GB           | FR           | BE           | ES           | IT           | GR           | PL           | SE           | TR           | RO           | IL           |
|------------------|--------------|--------------|--------------|--------------|--------------|--------------|--------------|--------------|--------------|--------------|--------------|
| 1                | 4.50         |              | 13.62        | 5.50         |              |              |              |              |              |              | 5.80         |
| 2                |              |              |              | 13.60        |              |              |              |              |              |              |              |
| 3                | 16.50        | 8.30         | 9.65         | 10.30        | 5.50         | 5.50         | 17.57        |              | 15.00        | 22.74        | 5.20         |
| 4                |              |              |              |              |              |              |              |              |              |              | 7.50         |
| 5                | 25.70        | 20.50        | 17.95        | 15.30        | 13.80        | 18.70        | 23.27        | 14.50        | 13.60        | 19.67        | 32.20        |
| 6                |              | 6.90         |              |              |              | 1.70         |              |              |              |              |              |
| 7                |              | 5.20         |              |              | 14.20        |              | 12.30        | 13.30        |              | 7.87         | 5.70         |
| 8                |              |              |              |              |              |              |              |              |              |              |              |
| 9                | 3.20         |              |              | 2.50         |              |              |              |              |              |              |              |
| 10               | 9.20         |              |              |              | 10.10        |              | 3.13         |              |              |              |              |
| 11               |              |              |              |              |              |              |              | 14.00        |              |              |              |
| 12               | 7.30         | 4.40         |              | 4.90         | 10.60        | 3.10         | 2.23         |              |              |              |              |
| 13               |              |              |              |              |              |              |              |              |              |              |              |
| 14               | 3.40         | 6.50         | 11.79        | 7.80         |              |              |              | 6.60         |              |              | 5.20         |
| 15               | 5.20         |              | 0.94         |              |              | 2.50         |              |              |              |              |              |
| 16               |              |              |              |              |              | 19.00        |              |              |              |              |              |
| 17               |              |              |              |              |              |              |              |              |              |              |              |
| 18               |              |              |              |              | 2.40         |              | 3.15         |              | 2.50         | 2.03         |              |
| 19               |              |              |              |              |              |              |              |              |              |              |              |
| 20               | 3.10         | 7.10         | 17.67        | 7.20         | 7.60         | 8.30         | 9.77         | 12.50        | 6.40         |              | 17.20        |
| 21               |              |              | 0.80         |              |              |              |              |              |              |              |              |
| 22               |              | 4.10         |              |              |              |              |              |              |              |              |              |
| 23               |              |              |              |              |              |              |              |              | 11.50        |              |              |
| 24               |              | 11.80        | 9.32         | 4.20         | 5.10         | 10.60        | 14.60        | 5.00         |              | 21.61        |              |
| 25               | 3.80         |              | 3.17         | 6.00         |              |              |              |              |              |              |              |
| <b>Remaining</b> | <b>18.10</b> | <b>25.20</b> | <b>15.09</b> | <b>22.70</b> | <b>30.70</b> | <b>30.60</b> | <b>13.99</b> | <b>34.10</b> | <b>51.00</b> | <b>26.08</b> | <b>21.20</b> |
